# Supplementary material for: Amoebozoans Are Secretly but Ancestrally Sexual: Evidence for Sex Genes and Potential Novel Crossover Pathways in Diverse Groups of Amoebae
Source: PubMed Central journal article supplement — Genome Biol Evol. 2017 Jan 13;9(2):375–87. doi: 10.1093/gbe/evx002 (PMC5381635; doi:10.1093/gbe/evx002), 2017-01-13
Supplement: evx002_Supp.pdf [file evx002_Supp.pdf]

# Supplementary Files

**Table S1.** Amoebozoa transcriptomes data sources.

| Clade                                               | Species                               | Data Source                      | Sequences                  | File Size (MB) |      |
|-----------------------------------------------------|---------------------------------------|----------------------------------|----------------------------|----------------|------|
| Archamoeba                                          | <i>Mastigamoeba balamuthi</i>         | GB EST                           | 19594                      | 9.3            |      |
|                                                     | <i>Acanthamoeba healyi</i>            | GB EST                           | 377                        | 0.09           |      |
|                                                     | <i>Gocevia fonbrunei</i>              | Tekle et al. 2016                | 18549                      | 5.5            |      |
|                                                     | <i>Stereomyxa ramosa</i>              | Moore                            | 19164                      | 21.1           |      |
|                                                     | <i>Mayorella sp.</i>                  | MMETSP0417                       | 10126                      | 16.1           |      |
|                                                     | <i>Neoparamoeba aestuarina</i>        | MMETSP0161                       | 18549                      | 16.0           |      |
|                                                     | <i>Paramoeba atlantica</i>            | MMETSP0151-2                     | 15432                      | 15.4           |      |
|                                                     | <i>Vexillifera bacillipedes</i>       | GB BioProj.<br>PRJNA222686       | 1753                       | 0.613          |      |
|                                                     | <i>Vexillifera sp.</i>                | MMETSP0173                       | 9564                       | 10.3           |      |
|                                                     | Eudiscosea                            | <i>Vannella sp. DIVA3 517612</i> | MMETSP0168                 | 15217          | 23.1 |
| <i>Vannella robusta</i>                             |                                       | MMETSP0166                       | 14497                      | 17.6           |      |
| <i>Vannella simplex</i>                             |                                       | GB BioProj.                      | 3073                       | 0.969          |      |
| <i>Clydonella sp. ATCC 50884</i>                    |                                       | Tekle et al. 2016                | 5386                       | 6.7            |      |
| <i>Unda schaefferi</i>                              |                                       | Tekle et al. 2016                | 3877                       | 4.2            |      |
| <i>Stenamoeba stenopodia</i>                        |                                       | GB BioProj.<br>PRJNA222684       | 12028                      | 4.2            |      |
| <i>Vermistella antarctica</i>                       |                                       | Tekle et al. 2016                | 5518                       | 10.1           |      |
| <i>Thecamoeba quadrilineata</i>                     |                                       | Tekle et al. 2016                | 7298                       | 10.9           |      |
| Himatismenida                                       |                                       | <i>Cochilopodium minutoidum</i>  | GB BioProj.<br>PRJNA222681 | 4013           | 1.4  |
|                                                     |                                       | <i>Ovalopodium desertum</i>      | GB Bioproj.<br>PRJNA222682 | 10359          | 3.5  |
|                                                     | <i>Parvamoeba monura</i>              | Tekle et al. 2016                | 5559                       | 6.9            |      |
| Mycetozoa                                           | <i>Actyostelium subglobosum</i>       | GenBank EST                      | 60412                      | 43.2           |      |
|                                                     | <i>Hyperamoeba dachnaya</i>           | GenBank EST                      | 2745                       | 0.912          |      |
|                                                     | <i>Physarum polycephalum</i>          | GenBank EST                      | 25120                      | 16.1           |      |
| Tubulinea                                           | <i>Hartmanella vermiformis</i>        | GenBank EST                      | 1334                       | 0.722          |      |
|                                                     | <i>Nolandella abertawensis</i>        | GB BioProj.<br>PRJNA222683       | 1843                       | 1.2            |      |
| Variosea                                            | <i>Flamella fluviatilis</i>           | GB BioProj.<br>PRJNA222680       | 11096                      | 3.9            |      |
|                                                     | <i>Filamoeba nolandi</i>              | MMETSP0413                       | 19244                      | 25.8           |      |
|                                                     | <i>Filamoeba sinensis</i>             | GB Bioproj.<br>PRJNA222679       | 19020                      | 6.6            |      |
| <i>Incertae sedis</i><br>(ATCC PRA-29 + Sapocribum) | <i>Pessonella sp. PRA-29</i>          | MMETSP0420                       | 15314                      | 18.7           |      |
|                                                     | <i>Pessonella sp.</i>                 | MMETSP0420                       | 13865                      | 18.5           |      |
| <i>Incertae sedis</i><br>(Trichosida)               | <i>Trichosphaerium sp. ATCC 40318</i> | MMETSP0405                       | 2709                       | 3.6            |      |

**Table S2.** Meiosis Genes Inventoried in Amoebozoa Transcriptomes.

| Gene                                 | <i>Mastigamoeba balamuthi</i> | <i>Acanthamoeba healyi</i> | <i>Gocevia fonbrunei</i> | <i>Stereomyxa ramosa</i> | <i>Mayorella sp.</i> | <i>Neoparamoeba aestuarina</i> | <i>Paramoeba atlantica</i> | <i>Vexillifera bacillipedes</i> | <i>Vexillifera sp.</i> | <i>Vannella sp.</i> | <i>Vannella robusta</i> | <i>Vannella simplex</i> | <i>Clydonella sp. ATCC 50004</i> | <i>Unda schaefferi</i> | <i>Stenamoeba stenopodia</i> | <i>Vermistella Antarctica</i> | <i>Thecamoeba quadrilineata</i> | <i>Cochilopodium minutoidum</i> | <i>Ovalopodium desertum</i> | <i>Parvamoeba monura</i> | <i>Actyostelium subglobosum</i> | <i>Hyperamoeba dachnaya</i> | <i>Physarum polycephalum</i> | <i>Hartmannella vermiformis</i> | <i>Nolandella abertawensis</i> | <i>Flamella fluviatilis</i> | <i>Filamoeba nolandii</i> | <i>Filamoeba sinensis</i> | <i>Pessonella sp. PRA-29</i> | <i>Pessonella sp.</i> | <i>Trichosphaerium sp. ATCC 40210</i> |   |
|--------------------------------------|-------------------------------|----------------------------|--------------------------|--------------------------|----------------------|--------------------------------|----------------------------|---------------------------------|------------------------|---------------------|-------------------------|-------------------------|----------------------------------|------------------------|------------------------------|-------------------------------|---------------------------------|---------------------------------|-----------------------------|--------------------------|---------------------------------|-----------------------------|------------------------------|---------------------------------|--------------------------------|-----------------------------|---------------------------|---------------------------|------------------------------|-----------------------|---------------------------------------|---|
| <b>Bouquet Formation</b>             |                               |                            |                          |                          |                      |                                |                            |                                 |                        |                     |                         |                         |                                  |                        |                              |                               |                                 |                                 |                             |                          |                                 |                             |                              |                                 |                                |                             |                           |                           |                              |                       |                                       |   |
| SAD1                                 |                               |                            | +                        | +                        |                      | +                              |                            |                                 | +                      | +                   |                         |                         |                                  |                        | +                            |                               |                                 |                                 | +                           |                          |                                 |                             |                              |                                 |                                |                             |                           |                           | +                            | +                     | +                                     |   |
| <b>Crossover Regulation</b>          |                               |                            |                          |                          |                      |                                |                            |                                 |                        |                     |                         |                         |                                  |                        |                              |                               |                                 |                                 |                             |                          |                                 |                             |                              |                                 |                                |                             |                           |                           |                              |                       |                                       |   |
| DMC1                                 |                               |                            |                          | +                        |                      |                                | +                          |                                 |                        |                     |                         |                         |                                  |                        |                              |                               |                                 |                                 |                             |                          |                                 |                             | +                            |                                 |                                |                             |                           |                           |                              |                       |                                       |   |
| HOP1                                 |                               |                            |                          |                          |                      |                                |                            |                                 |                        |                     |                         |                         |                                  |                        |                              |                               |                                 |                                 |                             |                          |                                 |                             | +                            |                                 |                                |                             |                           |                           |                              |                       |                                       |   |
| HOP2                                 |                               |                            |                          | +                        |                      | +                              | +                          |                                 | +                      | +                   | +                       |                         |                                  |                        |                              |                               | +                               |                                 |                             |                          |                                 |                             |                              |                                 |                                |                             | +                         |                           | +                            |                       |                                       |   |
| MER3                                 |                               |                            |                          |                          |                      |                                | +                          |                                 |                        |                     |                         |                         |                                  |                        |                              |                               |                                 |                                 |                             |                          |                                 |                             |                              |                                 |                                |                             |                           | +                         |                              |                       |                                       |   |
| MND1                                 |                               |                            |                          | +                        | +                    |                                | +                          | +                               | +                      | +                   | +                       |                         |                                  |                        |                              | +                             |                                 |                                 |                             | +                        |                                 |                             |                              |                                 |                                |                             | +                         |                           | +                            | +                     |                                       |   |
| MSH4                                 |                               |                            |                          | +                        |                      |                                |                            |                                 | +                      |                     |                         |                         |                                  |                        |                              |                               | +                               |                                 |                             |                          |                                 |                             |                              |                                 |                                |                             |                           |                           |                              |                       |                                       |   |
| MSH5                                 |                               |                            |                          |                          |                      |                                | +                          |                                 |                        |                     |                         |                         |                                  |                        |                              |                               |                                 |                                 |                             |                          |                                 |                             |                              |                                 |                                |                             |                           |                           |                              |                       |                                       |   |
| RED1                                 |                               |                            |                          |                          |                      |                                |                            |                                 |                        |                     |                         |                         |                                  |                        |                              |                               |                                 |                                 |                             |                          |                                 |                             |                              |                                 |                                |                             |                           |                           |                              |                       |                                       |   |
| ZIP1                                 |                               |                            |                          |                          |                      |                                |                            |                                 |                        |                     |                         |                         |                                  |                        |                              |                               |                                 |                                 |                             |                          |                                 |                             |                              |                                 |                                |                             |                           |                           |                              |                       |                                       |   |
| <b>DNA Damage Sensing/Response</b>   |                               |                            |                          |                          |                      |                                |                            |                                 |                        |                     |                         |                         |                                  |                        |                              |                               |                                 |                                 |                             |                          |                                 |                             |                              |                                 |                                |                             |                           |                           |                              |                       |                                       |   |
| MEC1/ATR                             |                               |                            |                          | +                        | +                    | +                              | +                          |                                 | +                      | +                   | +                       |                         |                                  |                        |                              | +                             | +                               |                                 |                             | +                        |                                 | +                           | +                            | +                               |                                | +                           | +                         | +                         | +                            | +                     | +                                     |   |
| MRE11                                |                               |                            |                          | +                        | +                    | +                              | +                          |                                 | +                      | +                   | +                       |                         | +                                |                        |                              | +                             | +                               |                                 |                             | +                        |                                 | +                           |                              |                                 |                                |                             | +                         |                           |                              |                       |                                       | + |
| RAD17                                |                               |                            |                          | +                        |                      | +                              |                            |                                 |                        | +                   | +                       |                         |                                  |                        |                              |                               |                                 |                                 |                             |                          |                                 |                             |                              |                                 |                                |                             |                           | +                         |                              |                       |                                       |   |
| RAD23                                |                               |                            |                          | +                        | +                    | +                              | +                          |                                 | +                      | +                   | +                       |                         | +                                | +                      |                              | +                             | +                               |                                 |                             | +                        | +                               | +                           |                              |                                 |                                |                             | +                         |                           | +                            | +                     |                                       |   |
| RAD24                                | +                             | +                          | +                        | +                        | +                    | +                              | +                          | +                               | +                      | +                   | +                       |                         | +                                | +                      | +                            | +                             | +                               | +                               | +                           | +                        | +                               | +                           | +                            | +                               | +                              | +                           | +                         | +                         | +                            | +                     | +                                     |   |
| RAD50                                |                               |                            |                          | +                        | +                    | +                              |                            | +                               | +                      | +                   |                         |                         |                                  | +                      | +                            | +                             | +                               |                                 |                             |                          |                                 |                             |                              |                                 |                                |                             | +                         |                           | +                            | +                     | +                                     |   |
| TEL1/ATM                             |                               |                            |                          | +                        | +                    | +                              | +                          |                                 | +                      | +                   | +                       |                         |                                  |                        |                              | +                             |                                 |                                 |                             |                          | +                               |                             | +                            | +                               |                                | +                           | +                         | +                         | +                            | +                     | +                                     |   |
| <b>Double-Strand Break Formation</b> |                               |                            |                          |                          |                      |                                |                            |                                 |                        |                     |                         |                         |                                  |                        |                              |                               |                                 |                                 |                             |                          |                                 |                             |                              |                                 |                                |                             |                           |                           |                              |                       |                                       |   |

|                                                               |   |  |   |   |   |   |   |   |   |   |   |   |   |   |  |   |   |   |   |   |   |   |   |   |
|---------------------------------------------------------------|---|--|---|---|---|---|---|---|---|---|---|---|---|---|--|---|---|---|---|---|---|---|---|---|
| <b>SPO11</b>                                                  |   |  |   |   |   |   | + |   |   |   | + |   |   |   |  |   |   |   |   |   |   |   |   |   |
| <b>Double-Strand Break Repair (Nonhomologous End-Joining)</b> |   |  |   |   |   |   |   |   |   |   |   |   |   |   |  |   |   |   |   |   |   |   |   |   |
| KU70                                                          | + |  | + | + | + | + |   | + | + | + |   | + |   |   |  | + |   | + | + |   |   |   |   |   |
| KU80                                                          |   |  | + | + | + | + |   | + | + | + |   |   |   |   |  | + |   | + | + | + |   |   |   |   |
| LIG4/DNL1                                                     |   |  | + | + | + | + |   | + | + | + |   | + |   |   |  | + |   | + | + | + |   |   |   |   |
| XRCC4/LIF1                                                    |   |  | + | + |   |   |   |   |   |   |   |   |   |   |  |   |   |   |   |   |   |   |   |   |
| <b>Double-Strand Break Repair and Meiotic Divisions</b>       |   |  |   |   |   |   |   |   |   |   |   |   |   |   |  |   |   |   |   |   |   |   |   |   |
| <b>REC8</b>                                                   |   |  |   |   |   |   |   |   |   |   |   |   |   |   |  |   |   |   |   |   |   |   |   |   |
| <b>Recombinational Repair</b>                                 |   |  |   |   |   |   |   |   |   |   |   |   |   |   |  |   |   |   |   |   |   |   |   |   |
| BRCA2                                                         |   |  |   |   |   |   |   |   |   |   |   |   |   |   |  |   |   |   |   | + |   |   |   |   |
| DNA2                                                          |   |  | + | + | + | + |   | + | + | + |   |   |   |   |  | + | + |   | + | + | + | + |   |   |
| EXO1                                                          |   |  | + | + | + | + |   | + |   |   |   | + | + |   |  | + |   |   |   | + |   |   |   |   |
| FEN1                                                          | + |  | + | + | + | + |   | + | + | + |   | + | + |   |  | + | + |   | + | + | + |   |   |   |
| MLH1                                                          |   |  | + | + |   |   |   | + | + | + |   | + |   |   |  |   |   |   |   | + |   |   |   |   |
| MLH3                                                          |   |  | + | + |   |   |   | + | + |   |   | + |   |   |  |   |   |   |   | + |   |   |   |   |
| MMS4/EME1(s)                                                  |   |  |   |   |   |   |   |   |   |   |   |   |   |   |  |   |   |   |   |   |   |   |   |   |
| MPH1/FANCM(a,m)                                               |   |  | + |   | + |   |   | + | + |   |   |   |   |   |  | + |   |   |   | + |   |   |   |   |
| MSH2                                                          | + |  | + | + |   | + |   | + | + |   |   | + | + |   |  | + | + |   |   | + |   |   |   |   |
| MSH3                                                          | + |  | + | + | + | + |   | + | + |   |   |   |   |   |  |   |   |   |   |   |   |   |   |   |
| MSH6                                                          |   |  | + | + | + | + |   | + | + |   |   | + | + |   |  | + | + |   |   | + |   |   |   |   |
| MUS81                                                         |   |  | + | + | + | + |   | + | + |   |   | + |   |   |  | + |   |   |   | + |   |   |   |   |
| PMS1                                                          |   |  | + |   | + | + |   | + | + | + |   | + |   |   |  | + |   |   | + | + |   |   |   |   |
| RAD51                                                         |   |  | + | + | + | + | + | + | + | + |   | + | + |   |  | + |   |   | + | + | + | + | + |   |
| RAD52                                                         |   |  | + |   |   |   |   | + | + | + |   | + |   |   |  | + |   |   |   | + |   |   | + |   |
| RAD54                                                         | + |  | + | + | + | + | + | + | + | + |   | + |   |   |  | + | + | + |   | + | + | + | + |   |
| RTEL1                                                         |   |  | + | + | + | + |   | + | + | + |   | + | + |   |  | + | + |   |   | + |   | + | + |   |
| SGS1                                                          |   |  | + | + | + | + | + | + | + | + |   | + |   |   |  | + | + |   | + | + | + | + | + |   |
| SLX1                                                          |   |  |   |   |   |   |   |   | + |   |   | + | + |   |  |   |   |   |   |   |   |   |   |   |
| SMC5                                                          |   |  | + |   | + | + |   | + | + | + | + | + | + |   |  | + |   |   |   | + |   | + | + | + |
| SMC6                                                          |   |  | + | + | + | + | + | + |   | + |   | + | + | + |  | + |   |   |   | + | + | + | + |   |

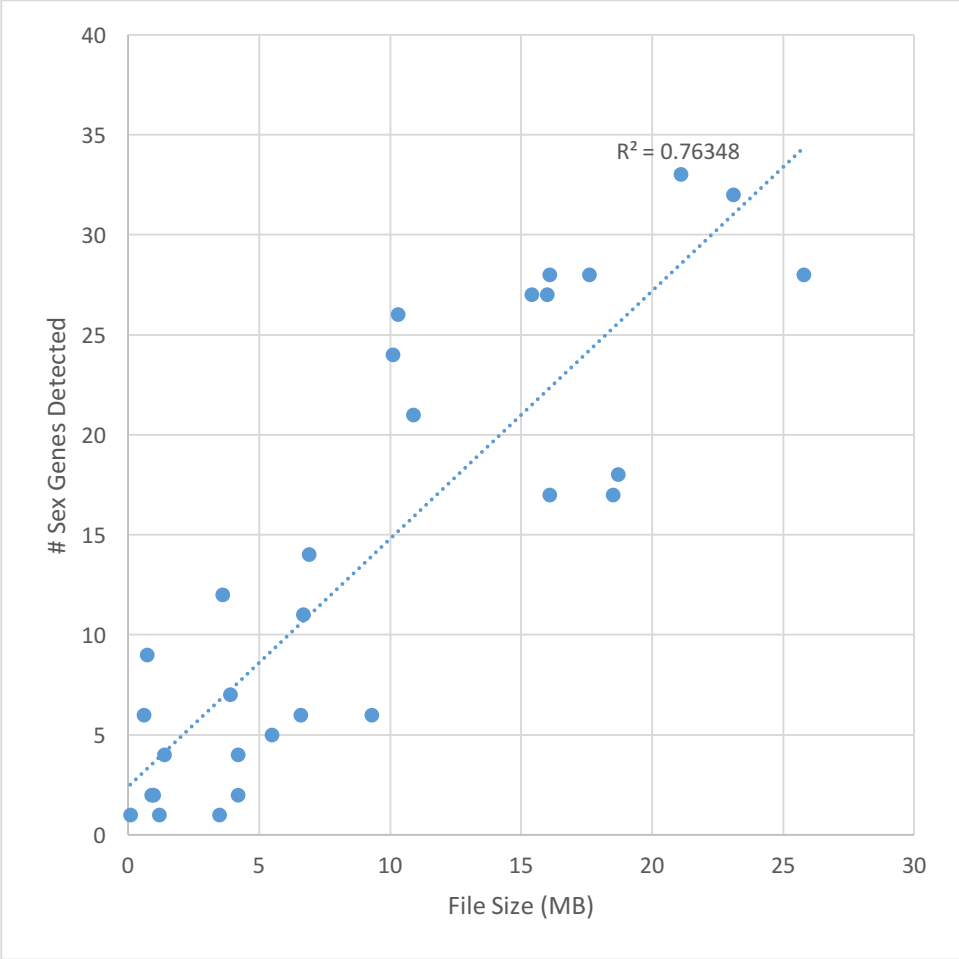

figure S1: Transcriptome data coverage vs. detection of sex genes in Amoebozoa. *Actyostelium subglobosom* transcriptome omitted as an outlier.

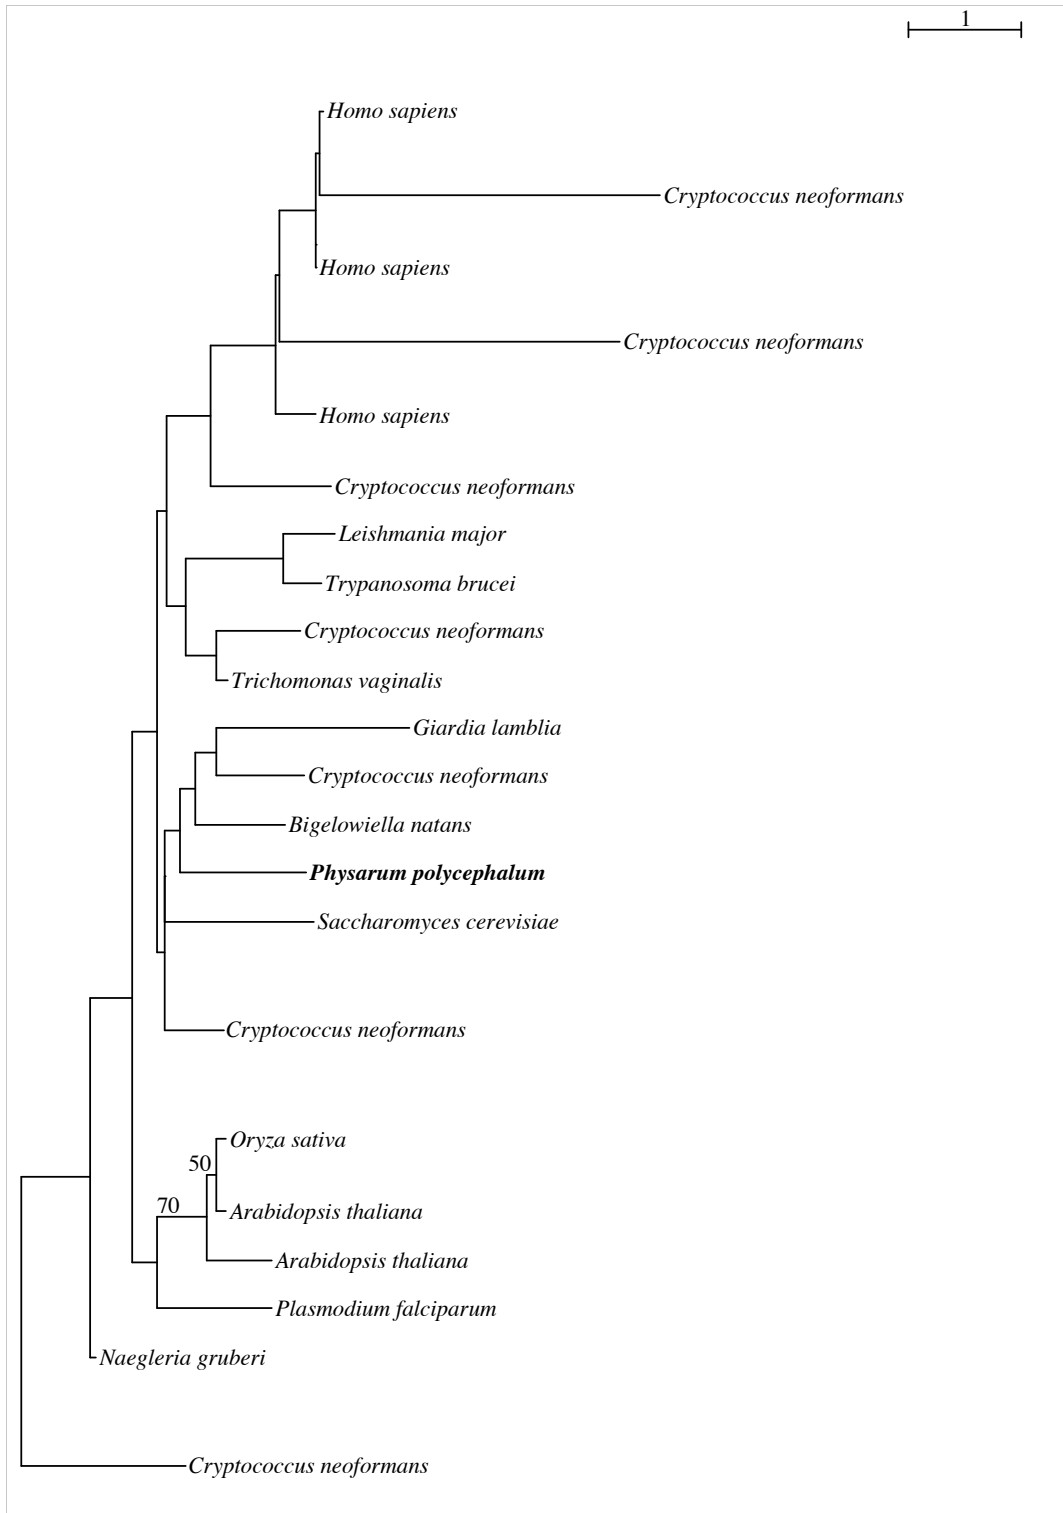

fig. S2: Maximum likelihood trees of meiosis-specific gene *HOPI*. Bootstrap support values  $\geq 50\%$  shown above branches.

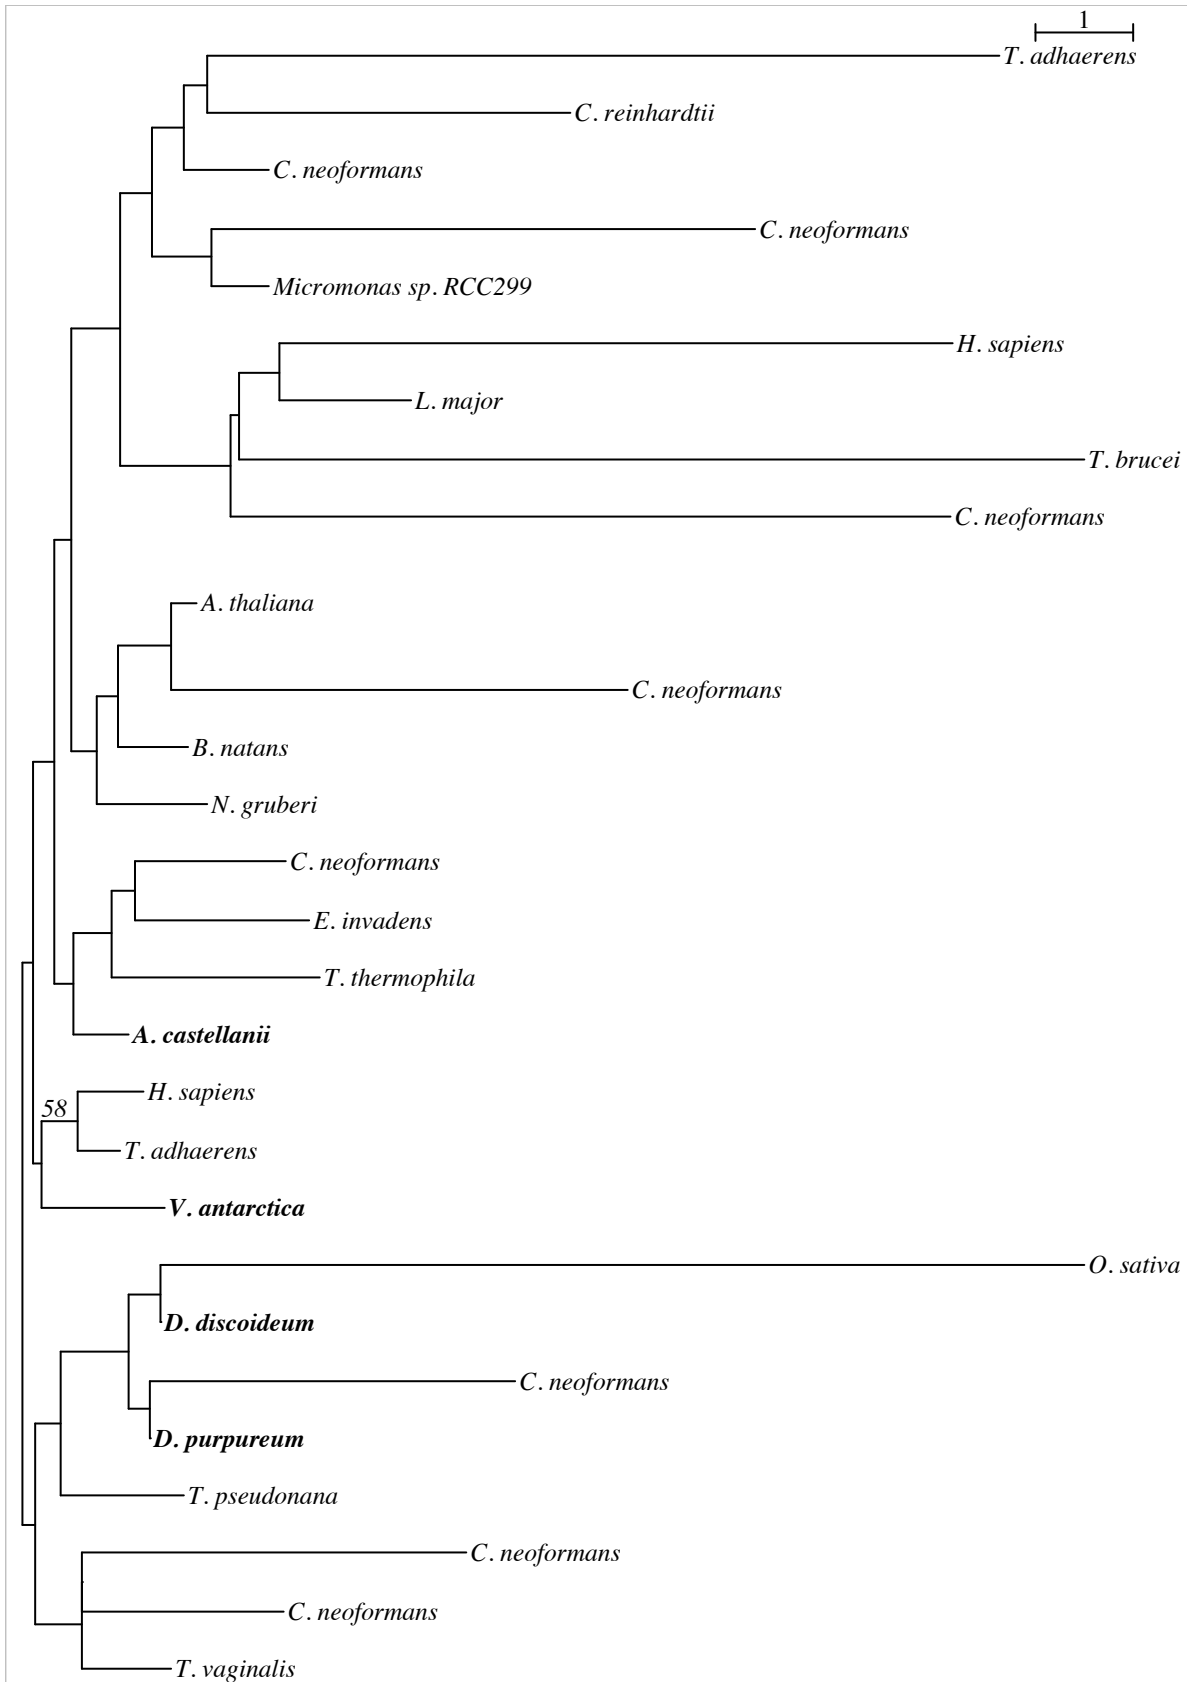

BRCA2

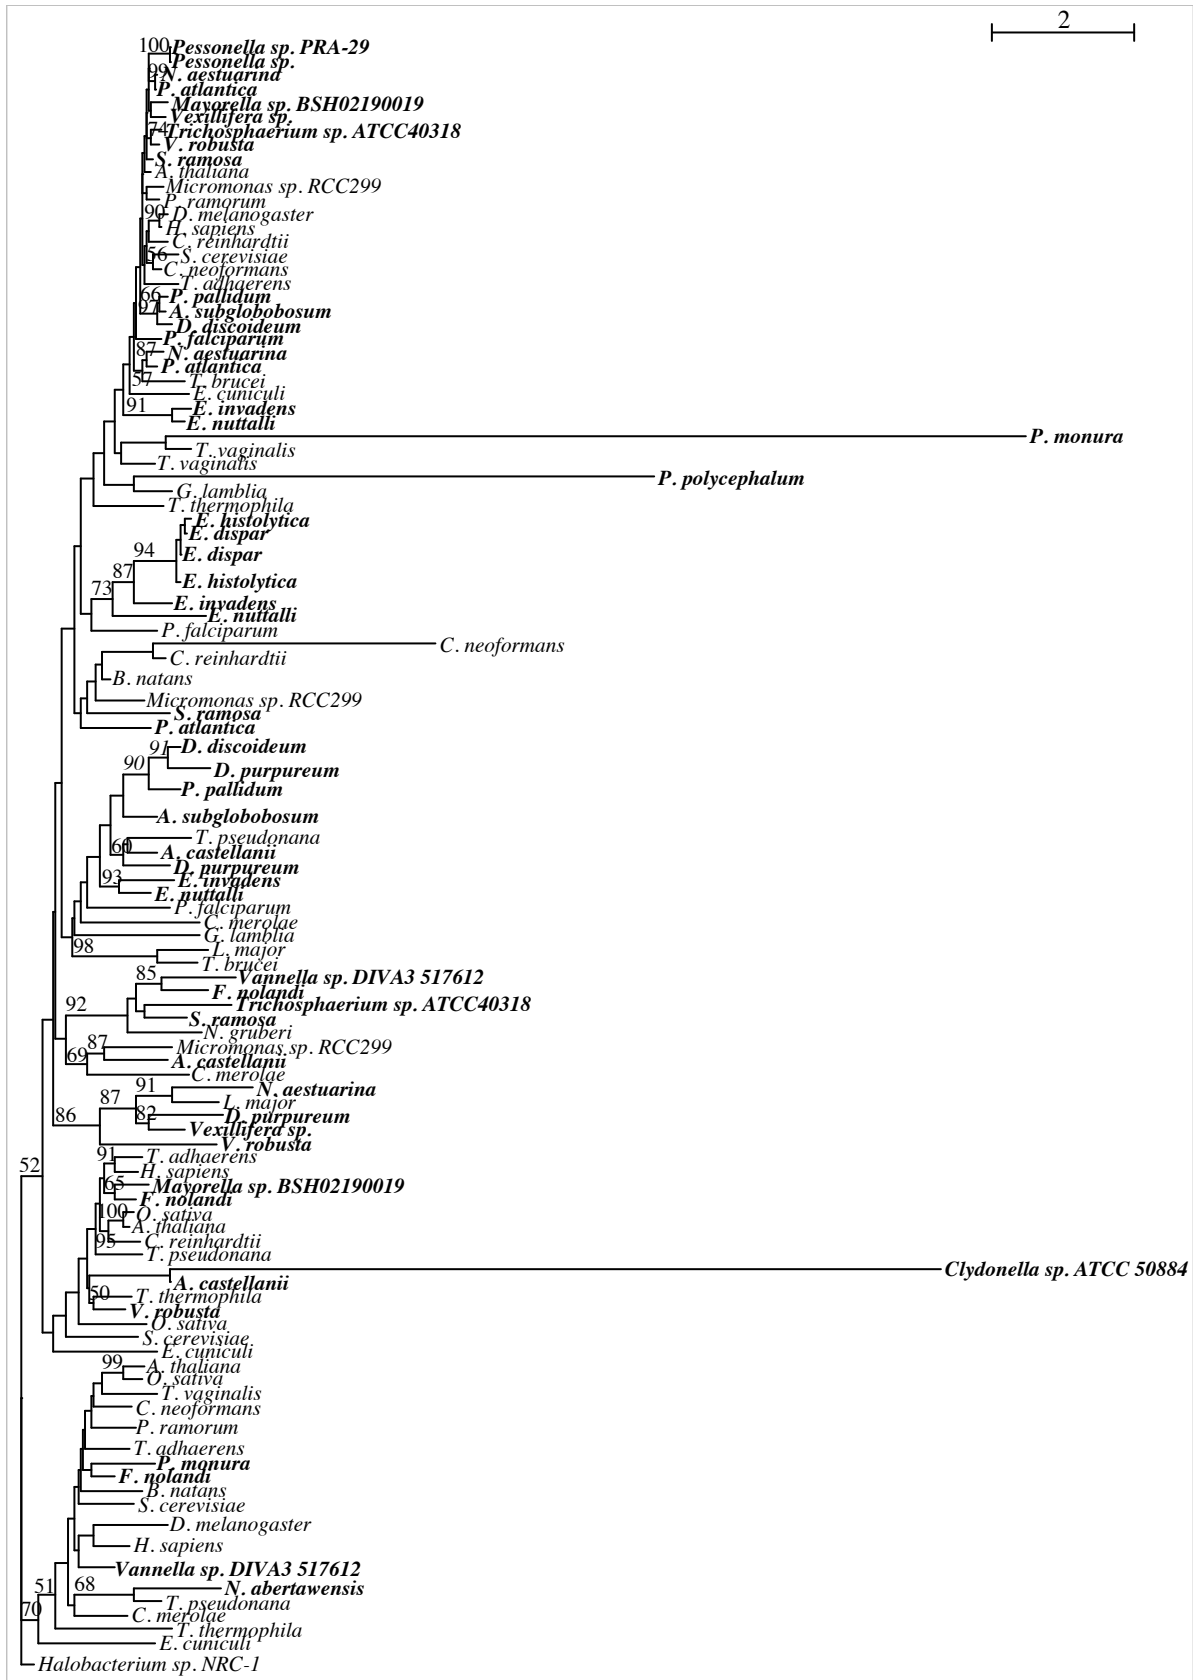

DNA2



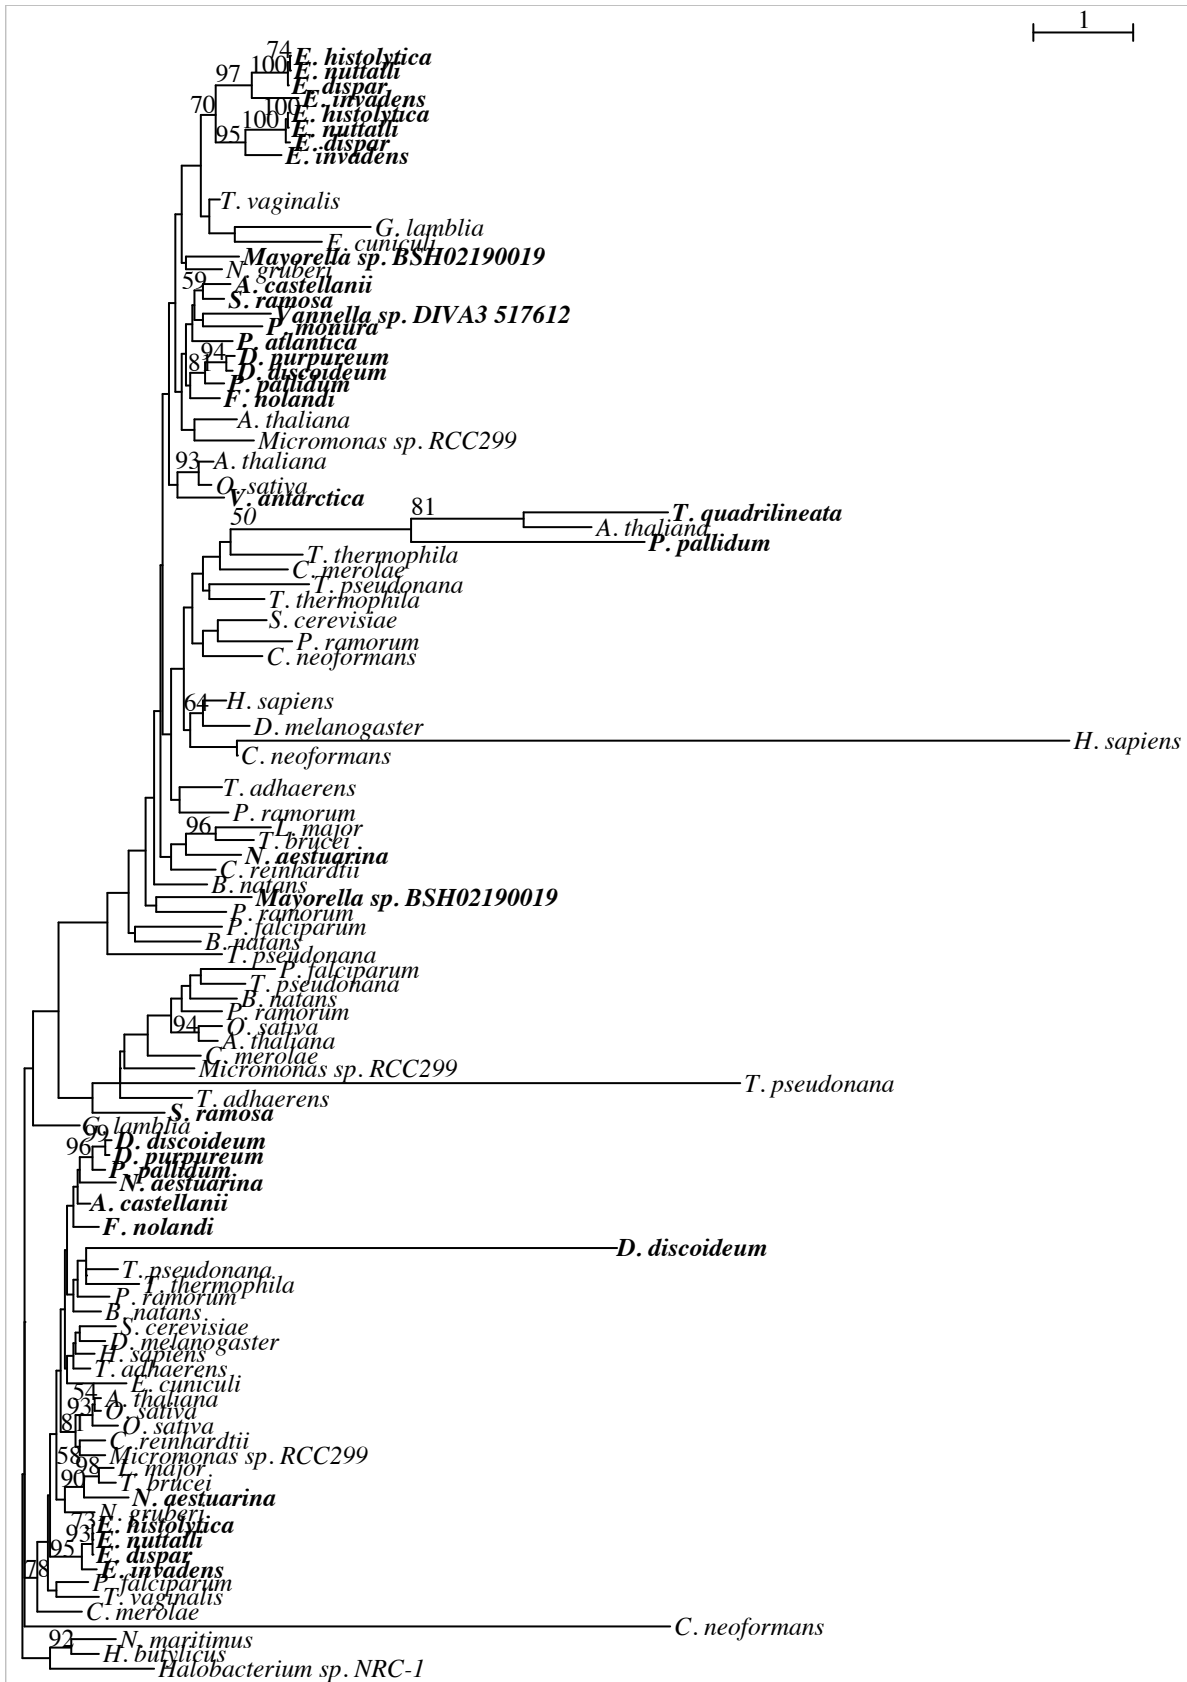

EXO1

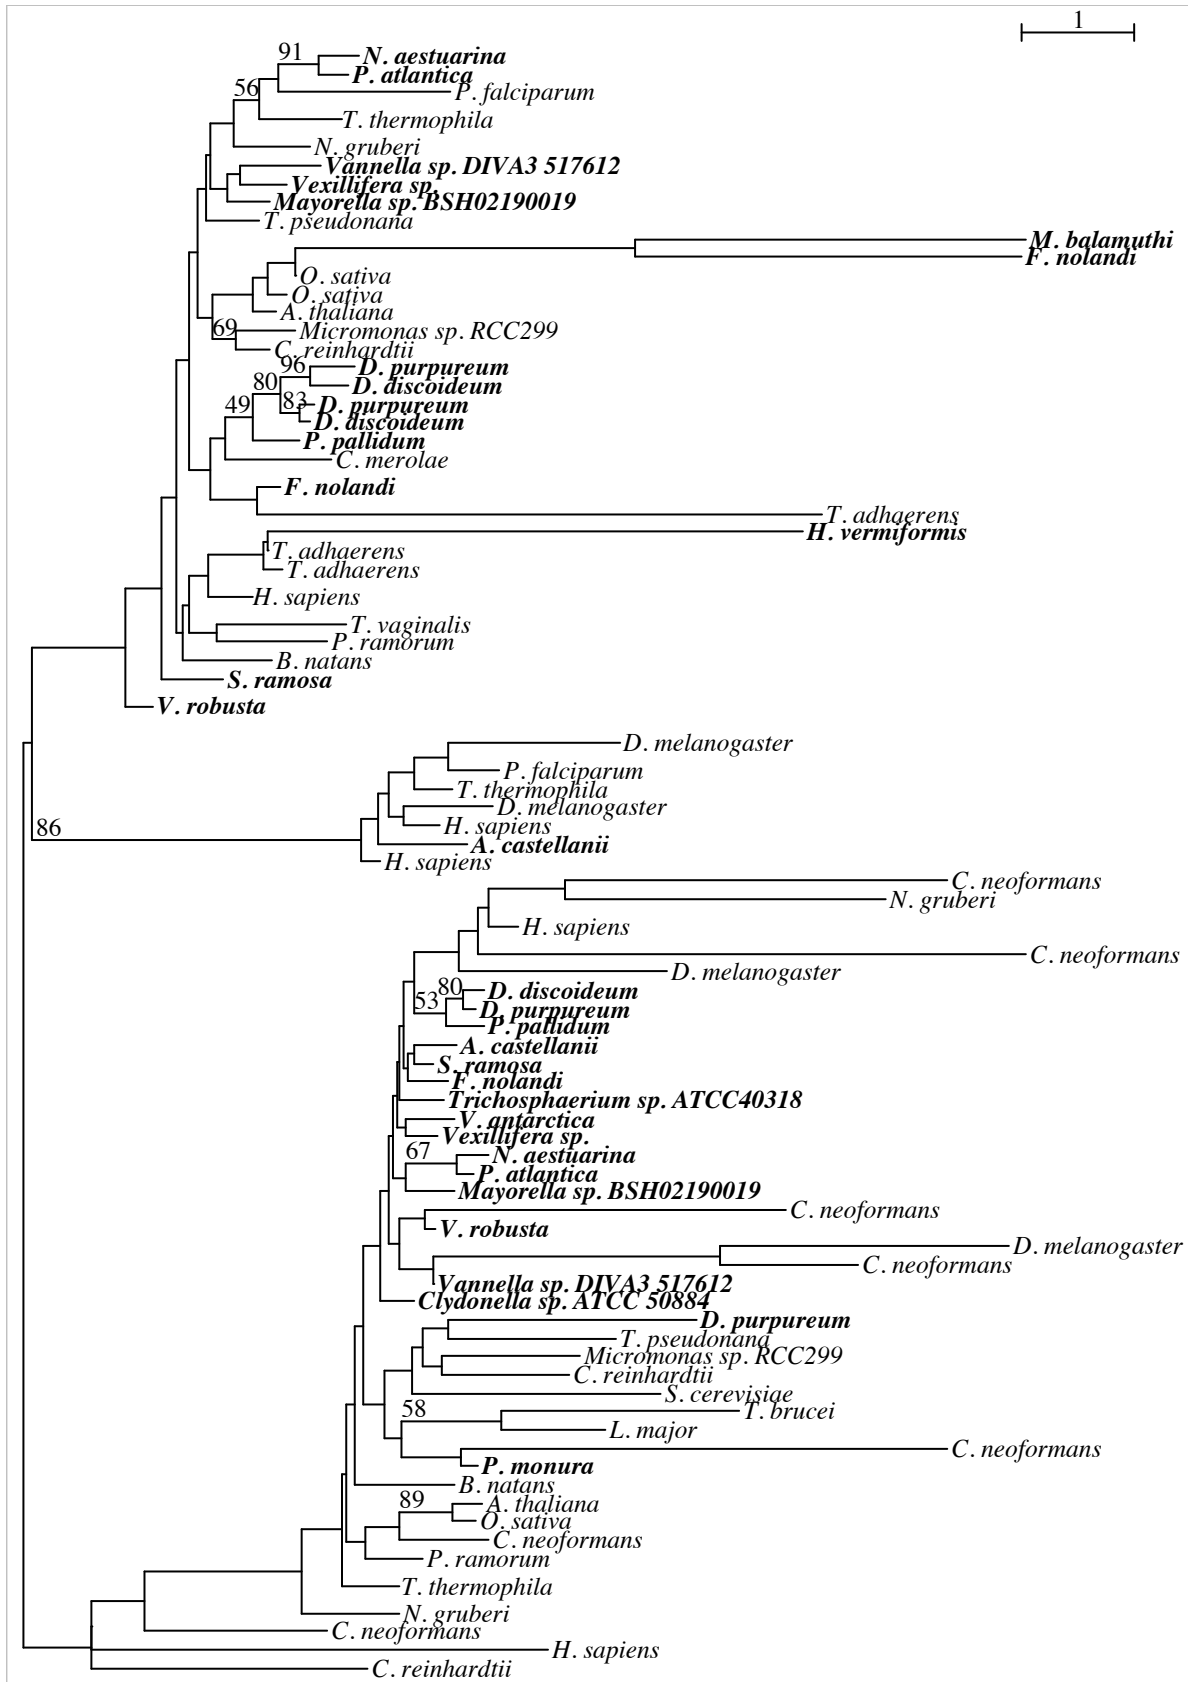

KU70

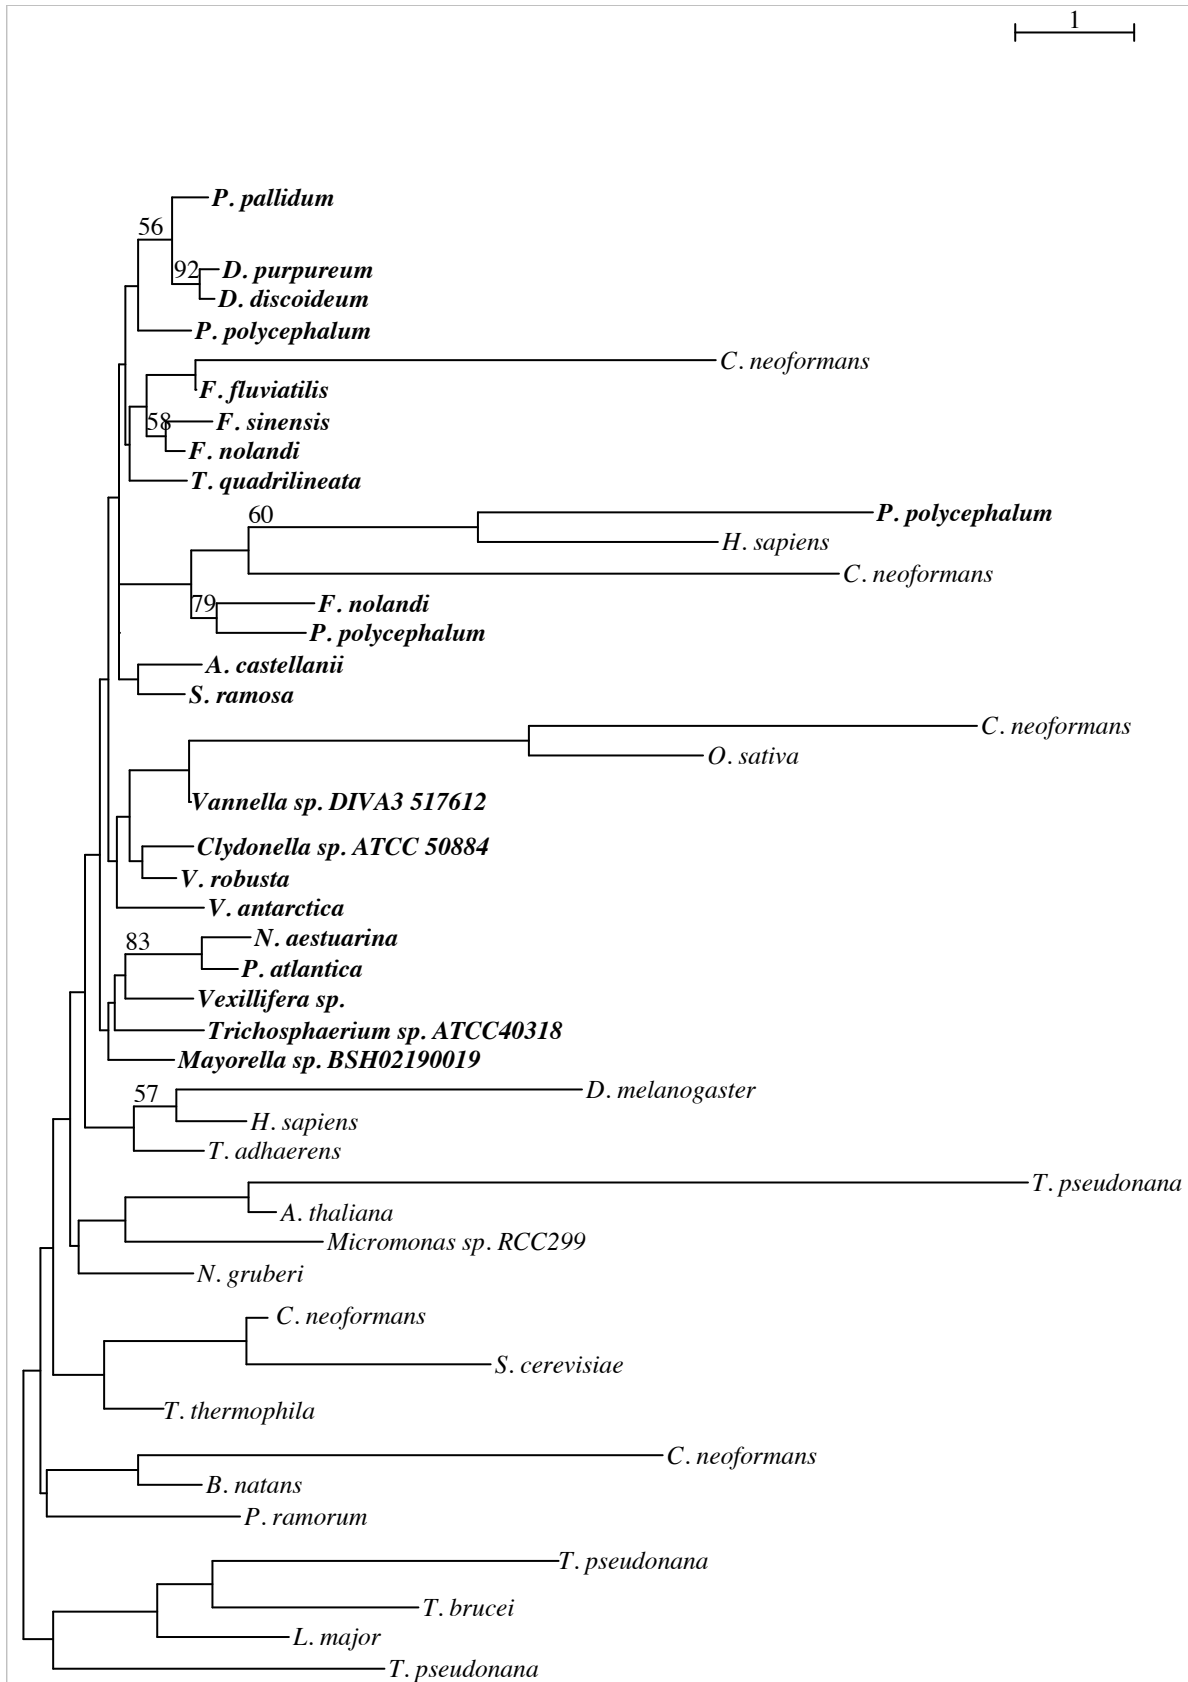

KU80

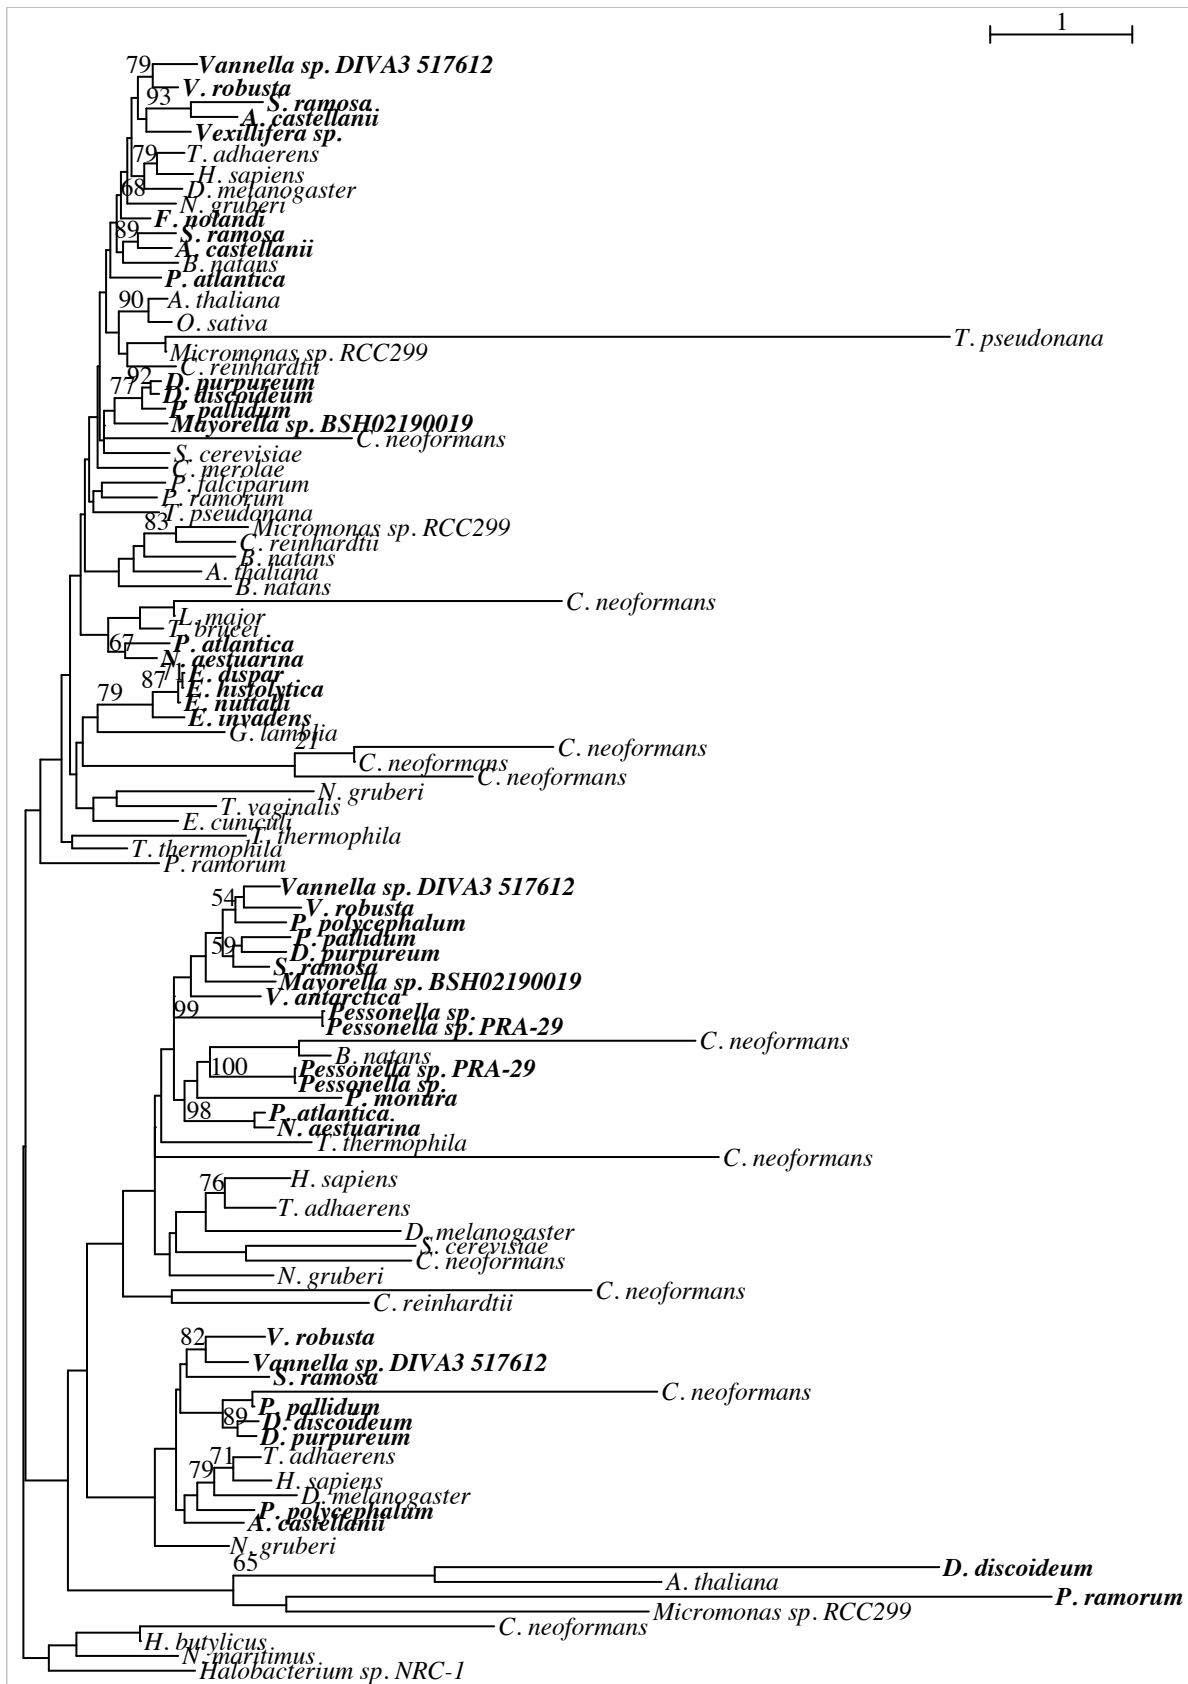

LIG4/DNA1

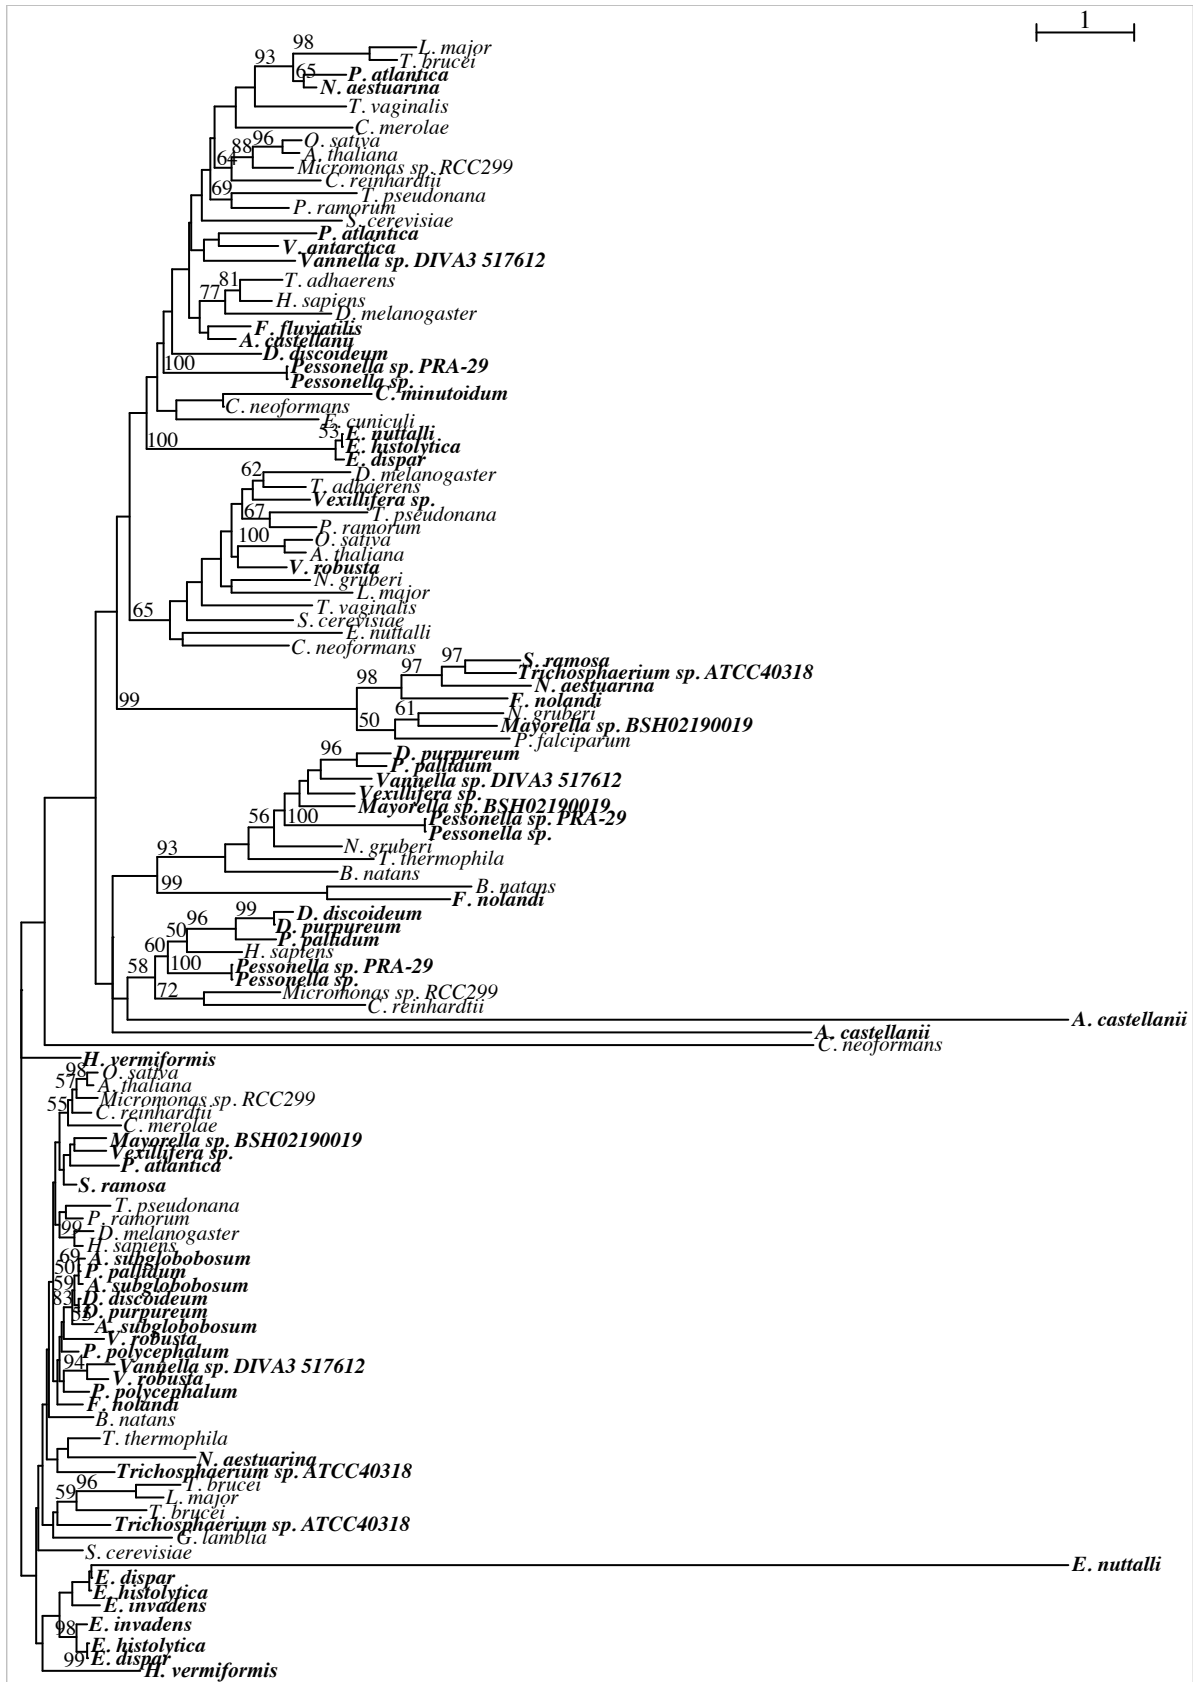

MEC1/ATR

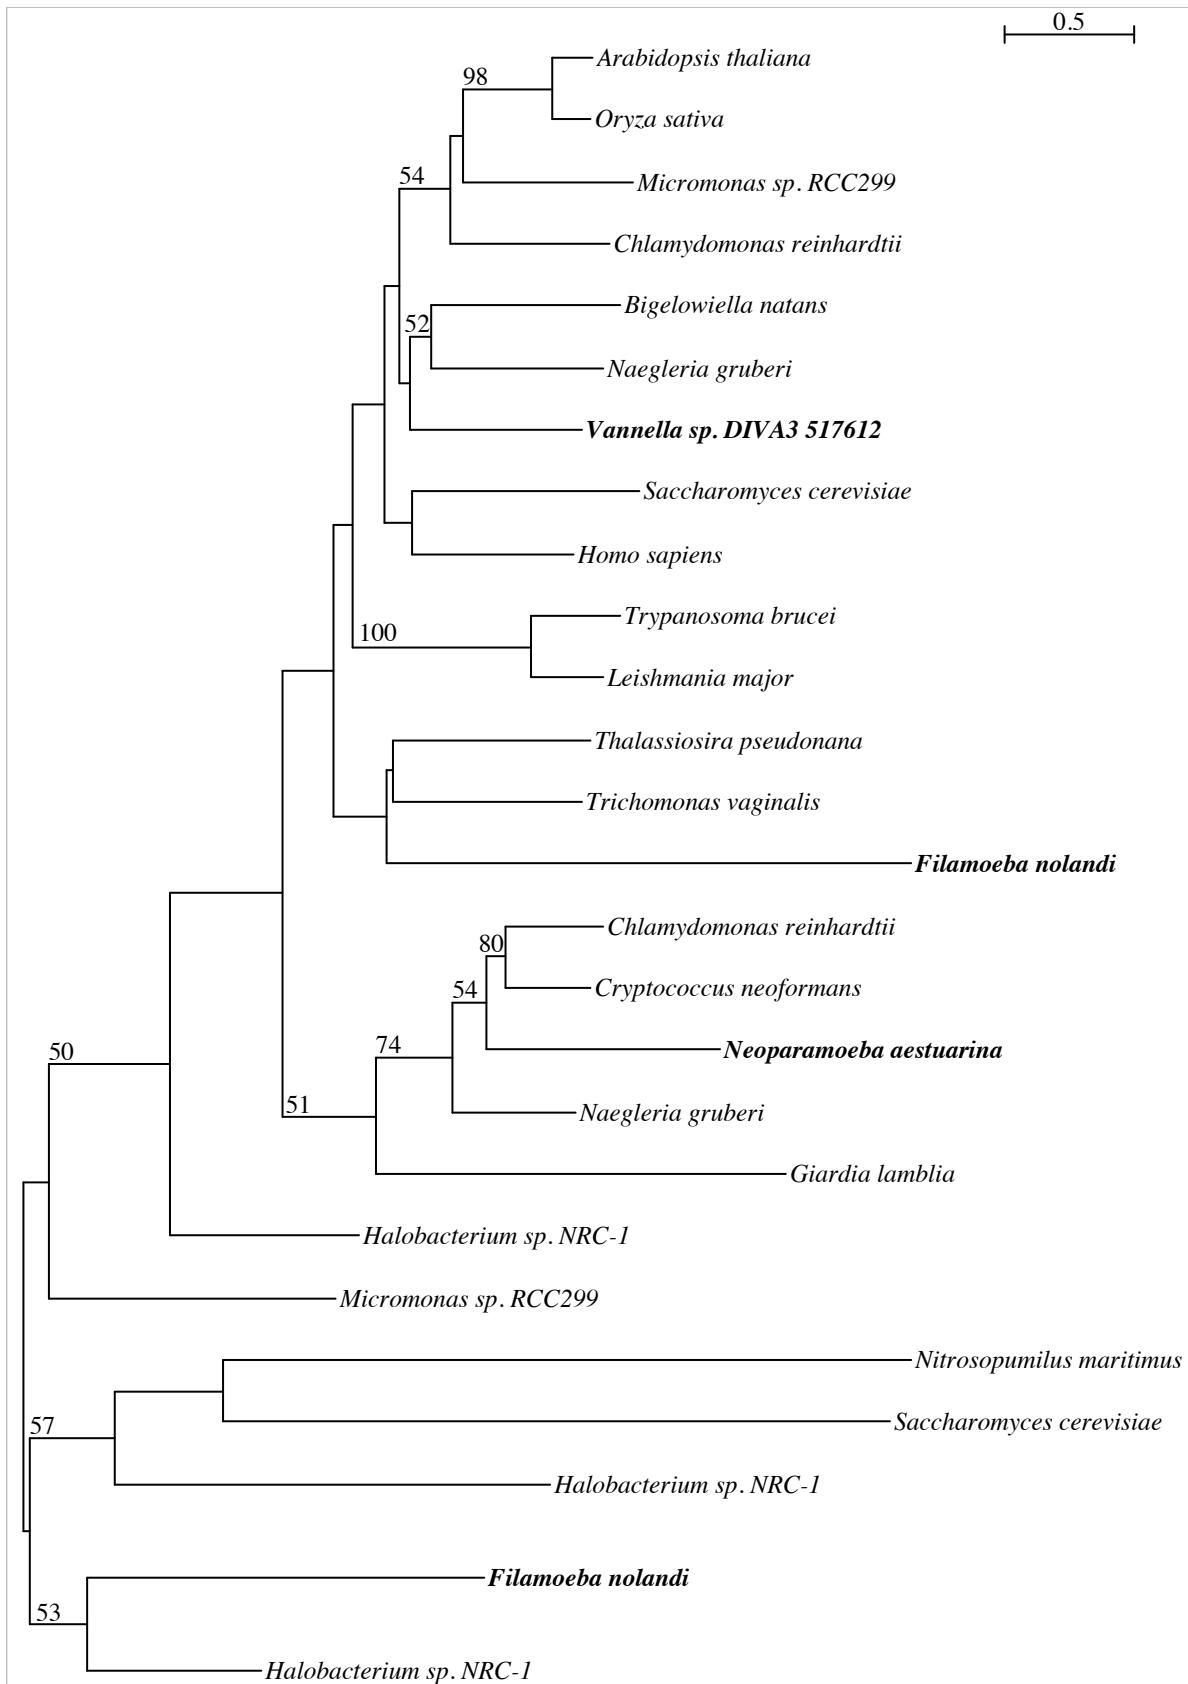

MER3

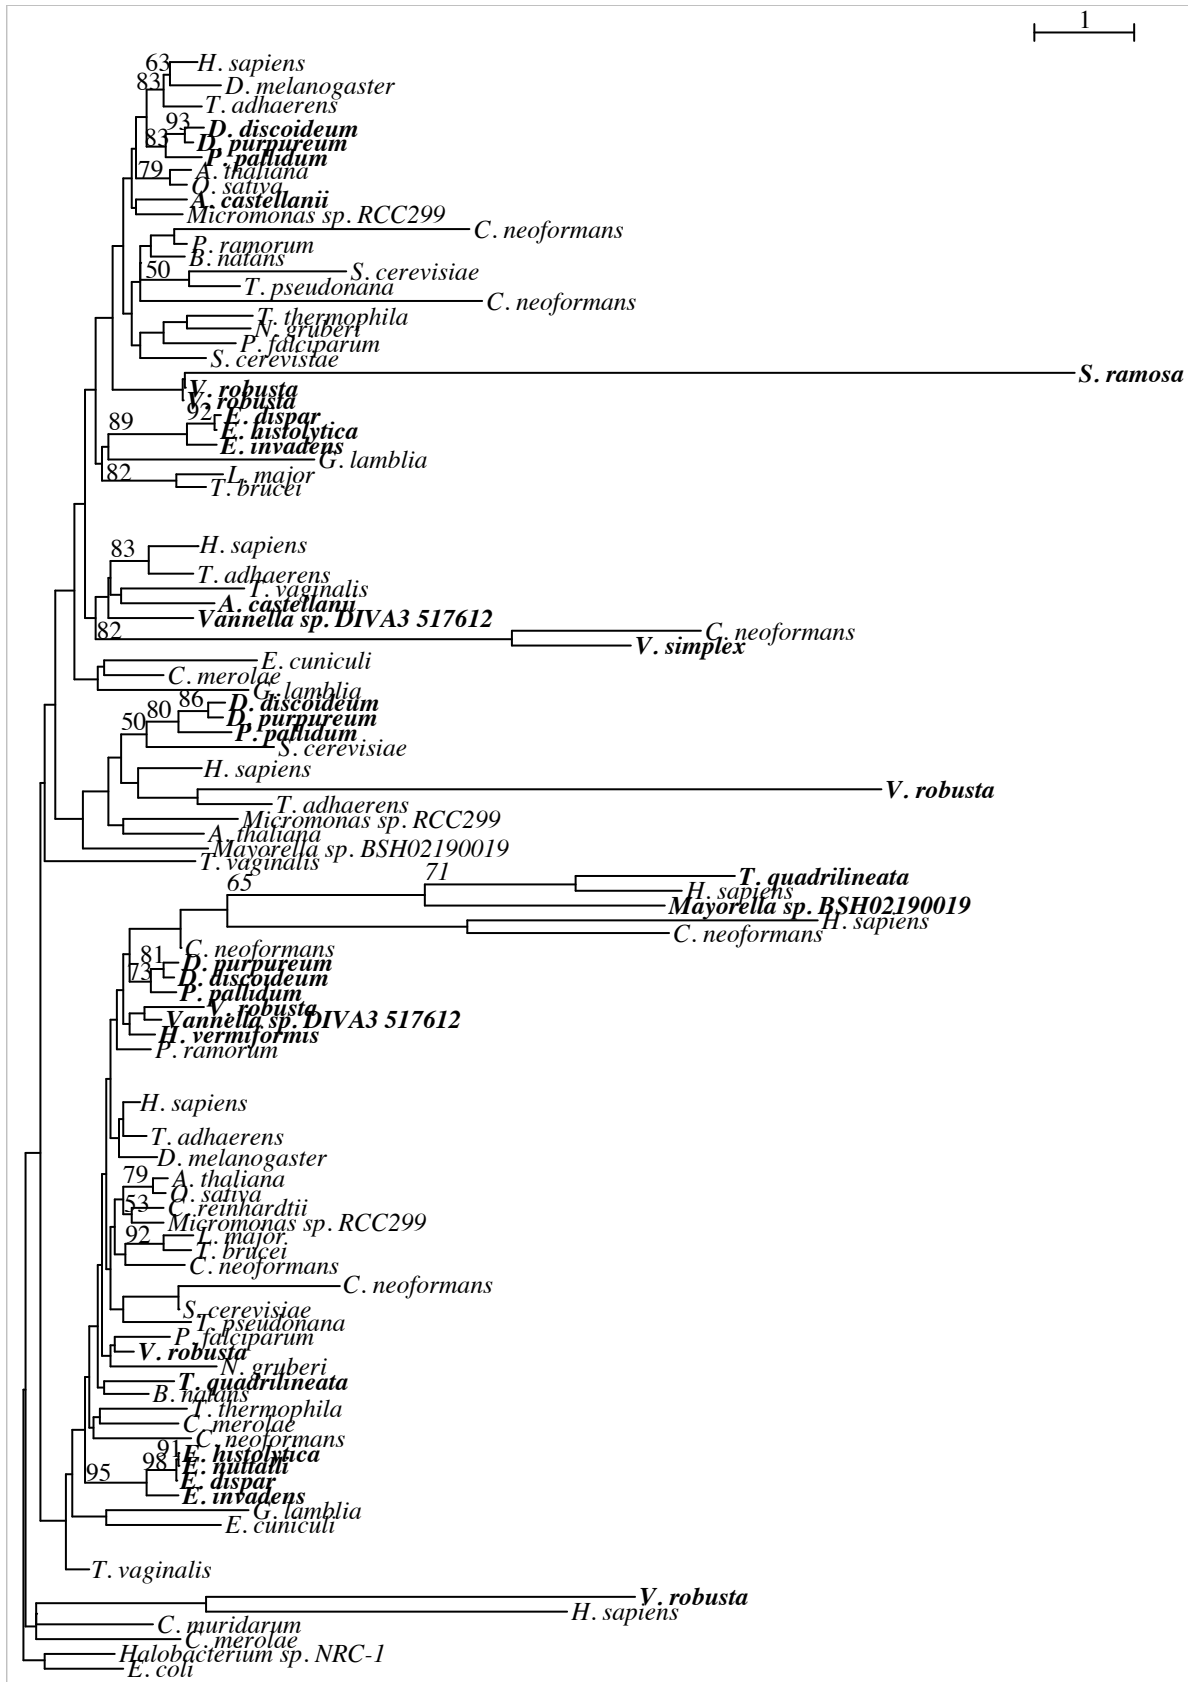

MLH1

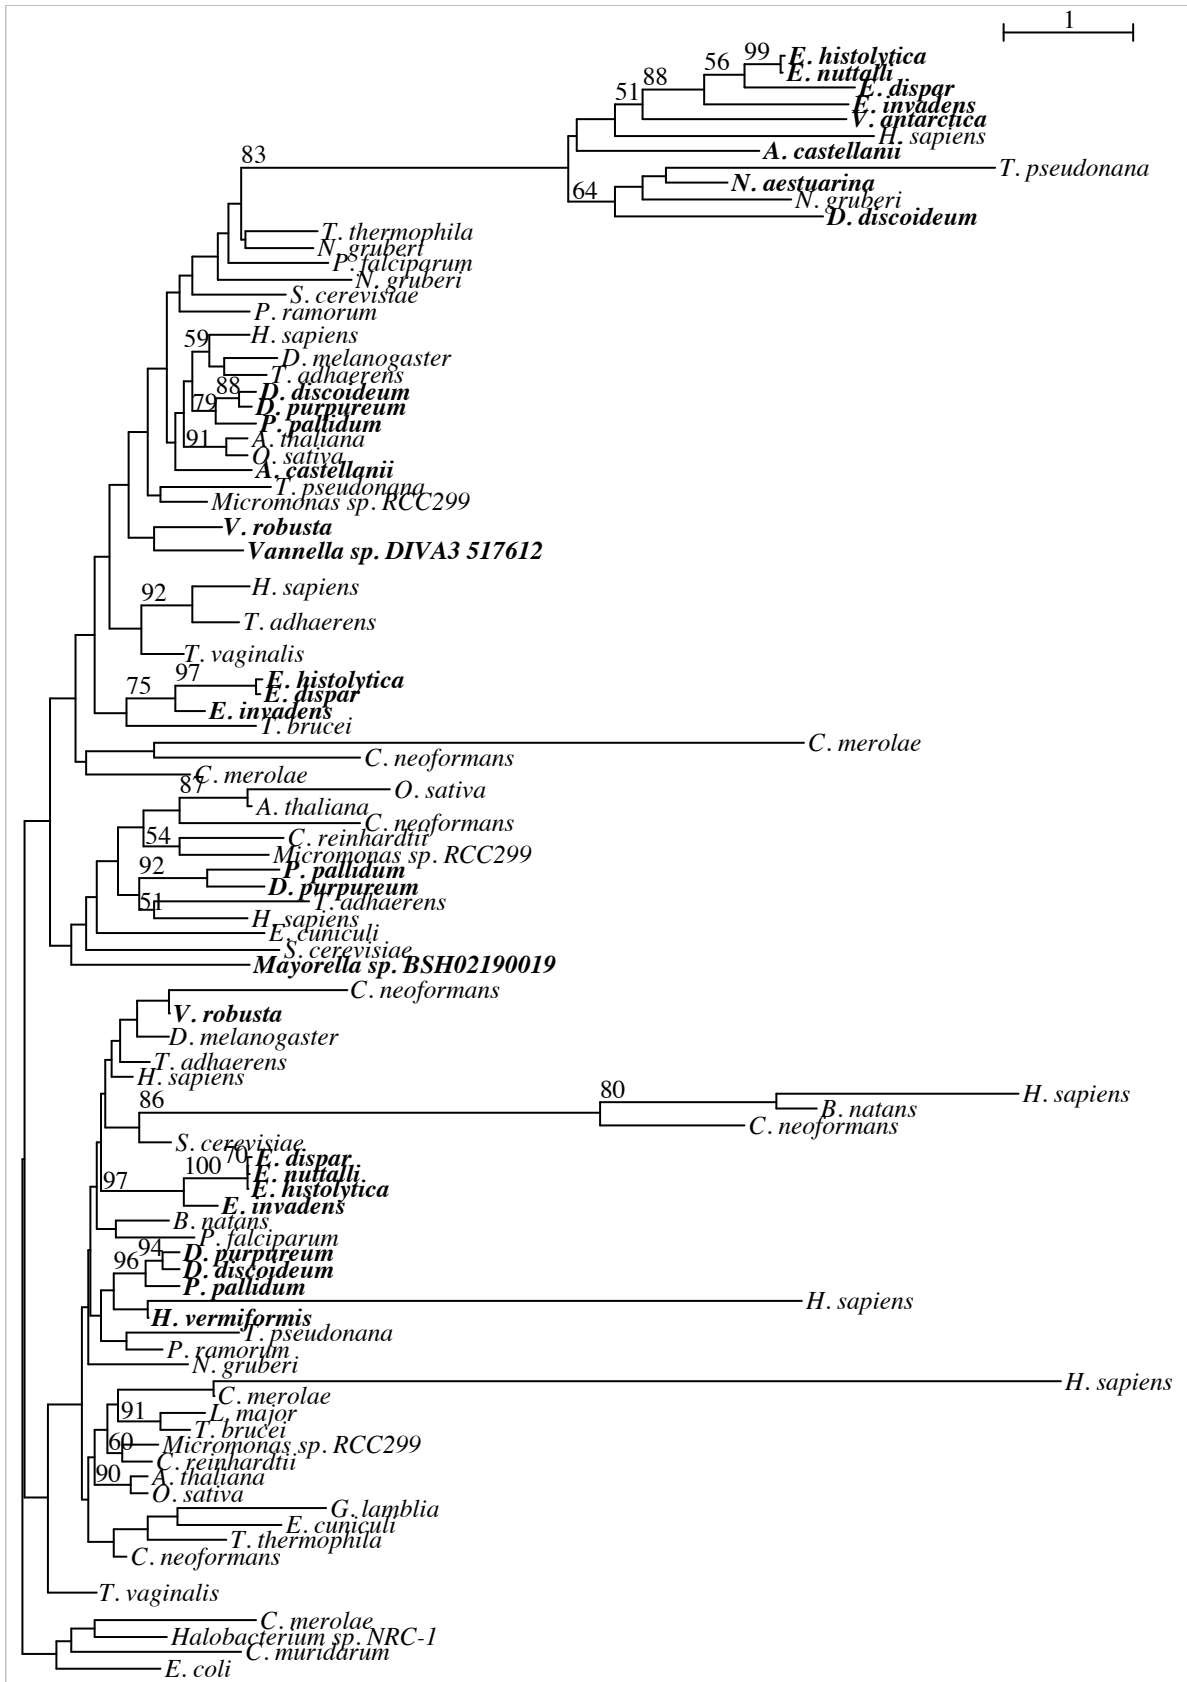

MLH3



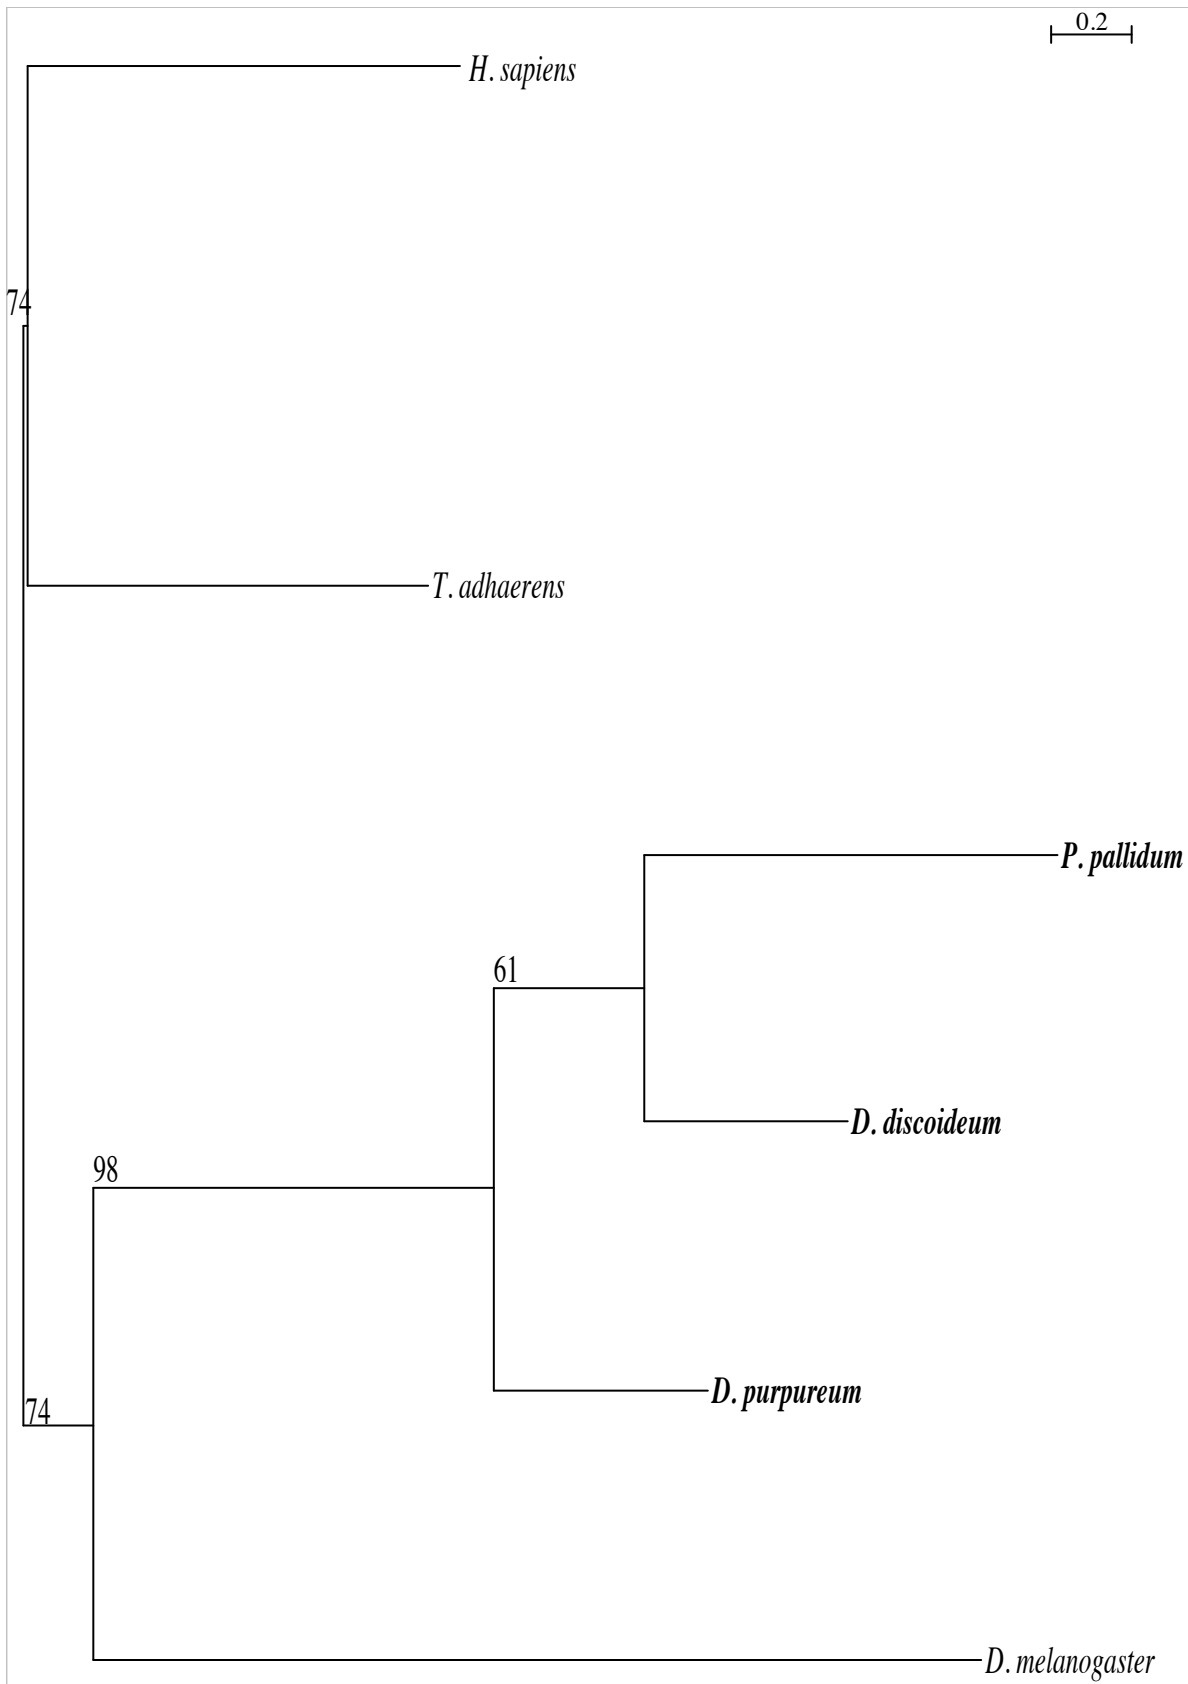

MMS4/EME1

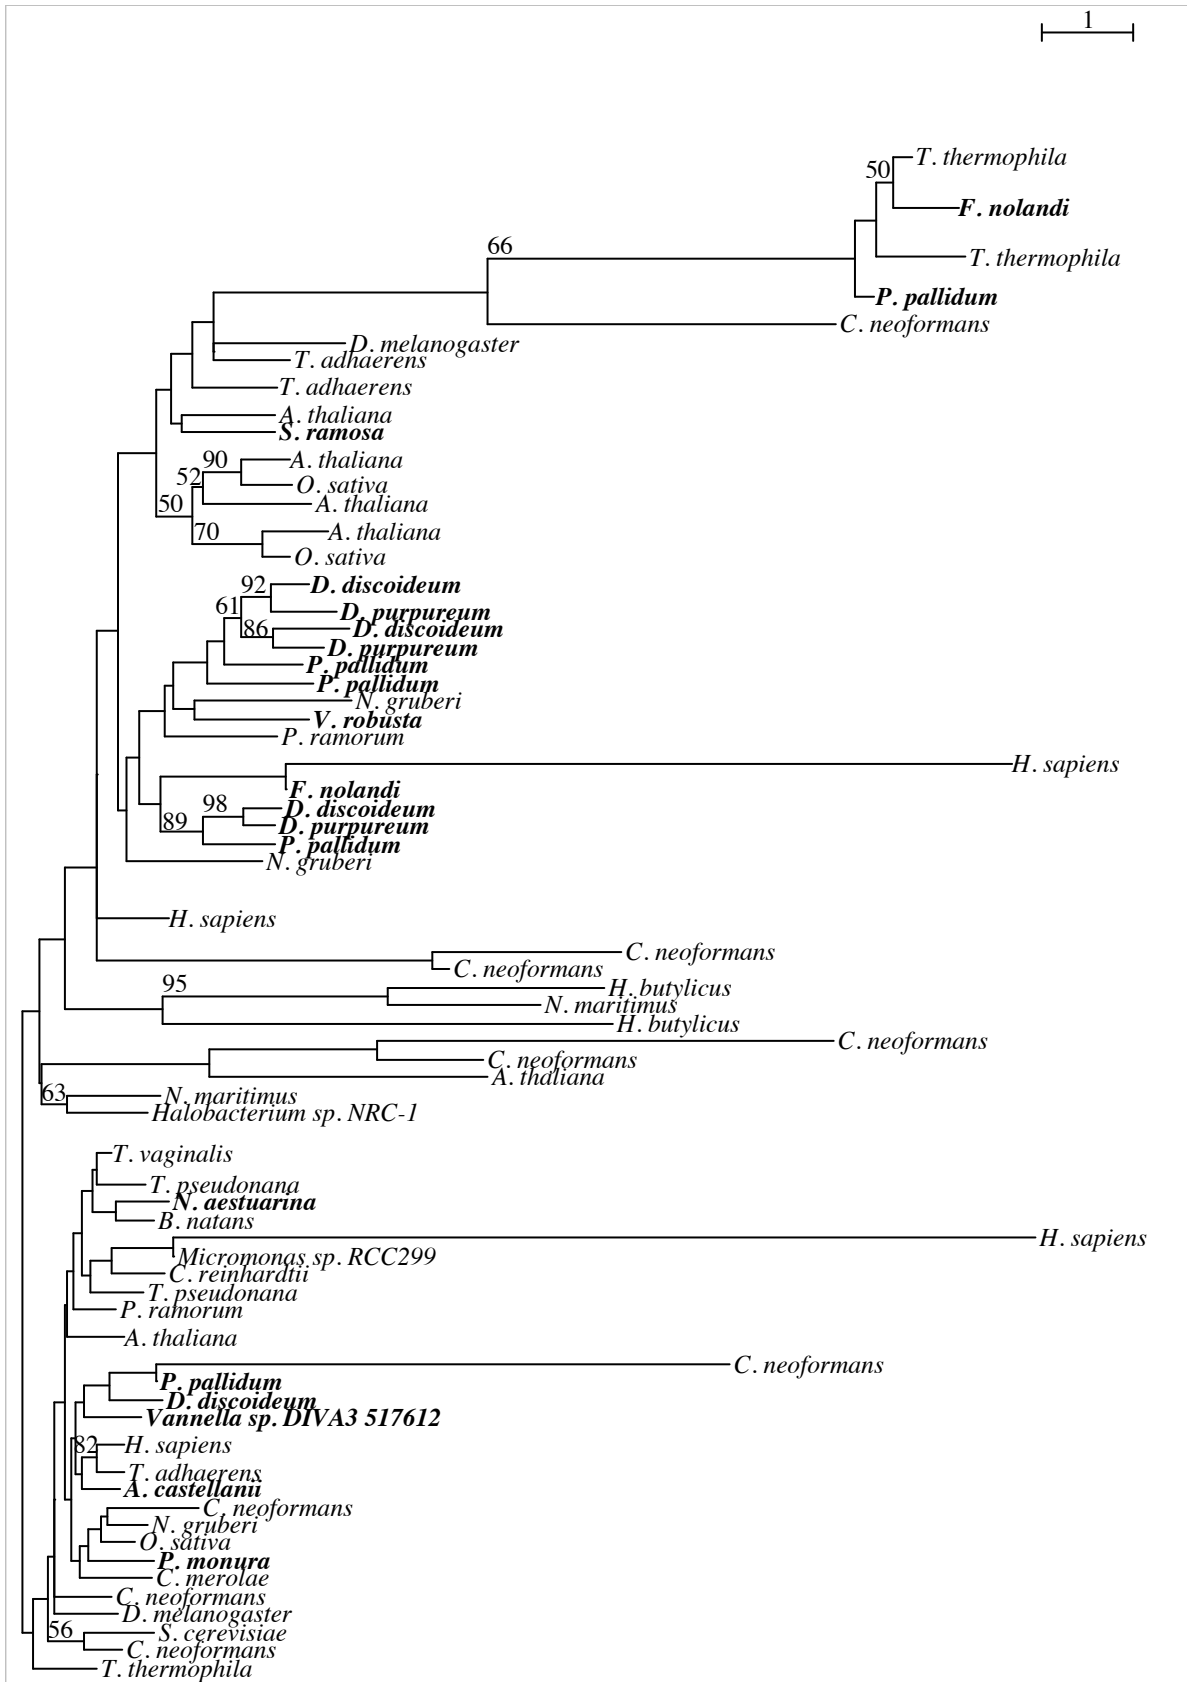

MPH1/FANCM

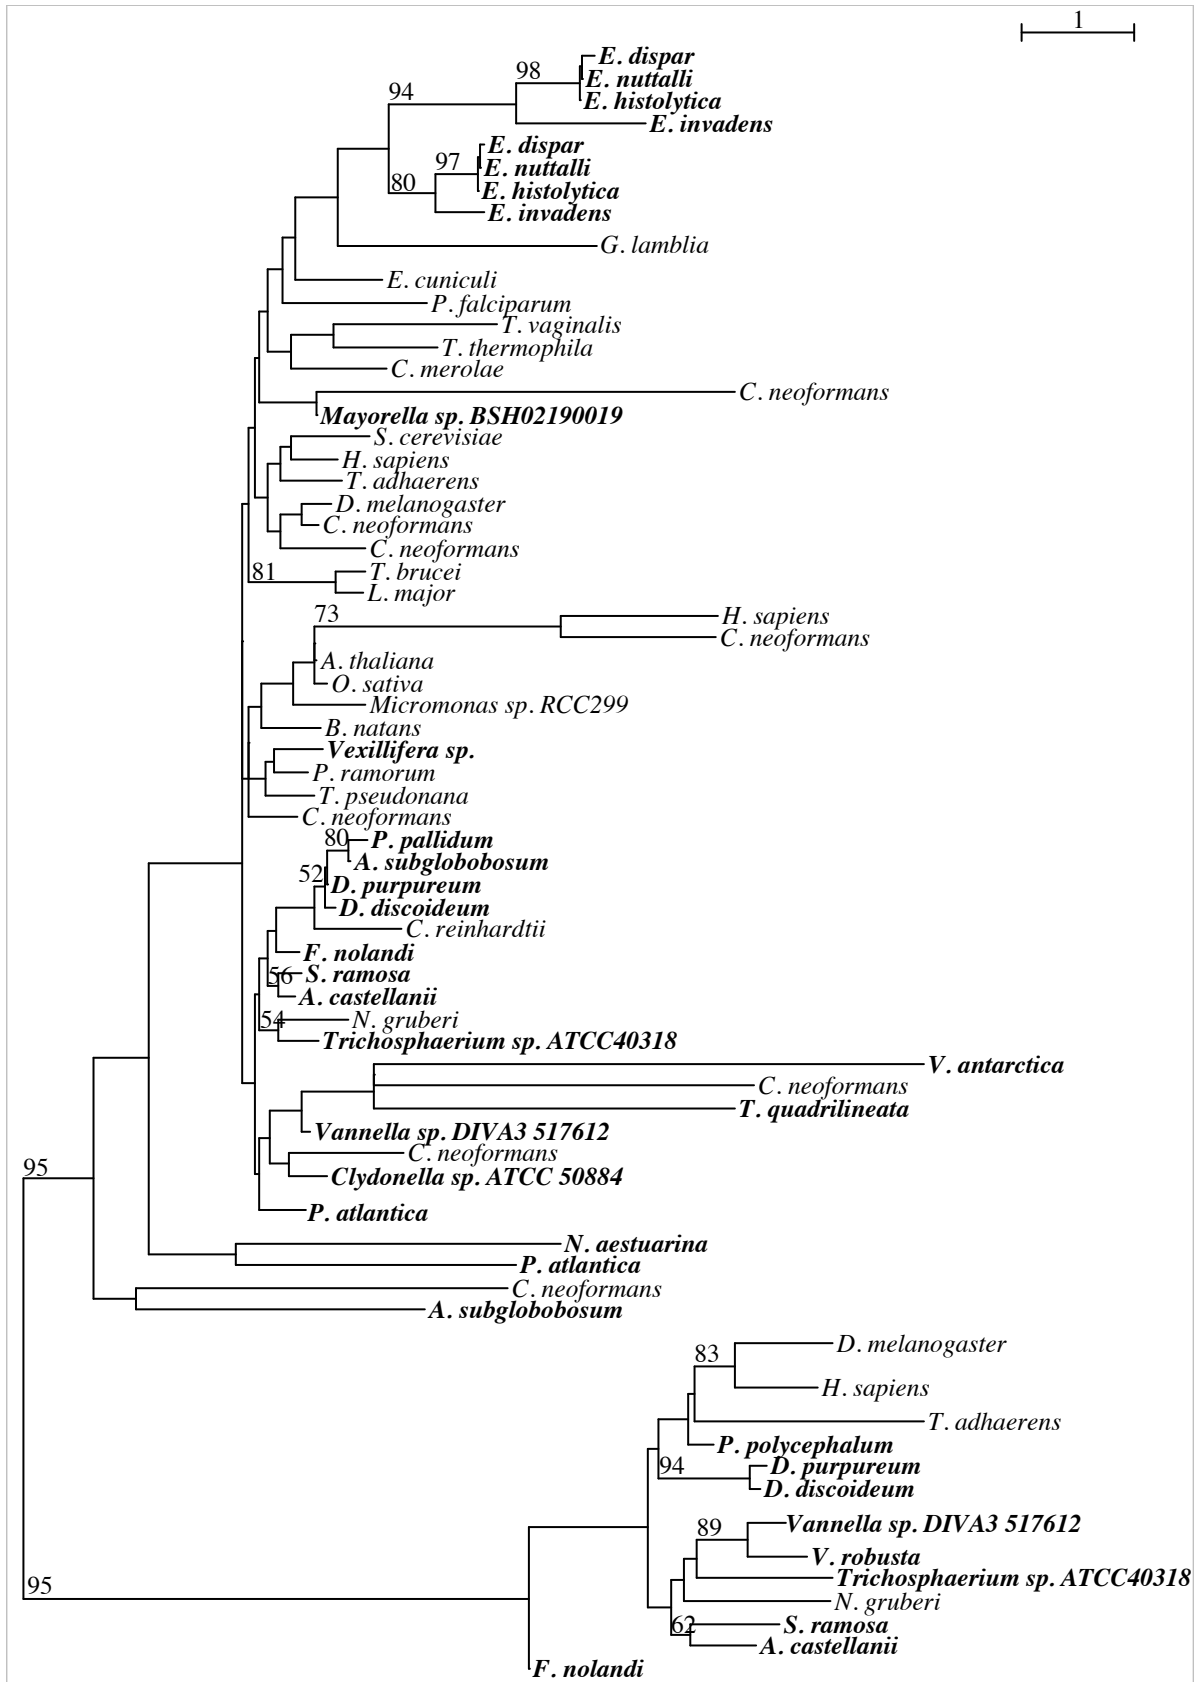

MRE11

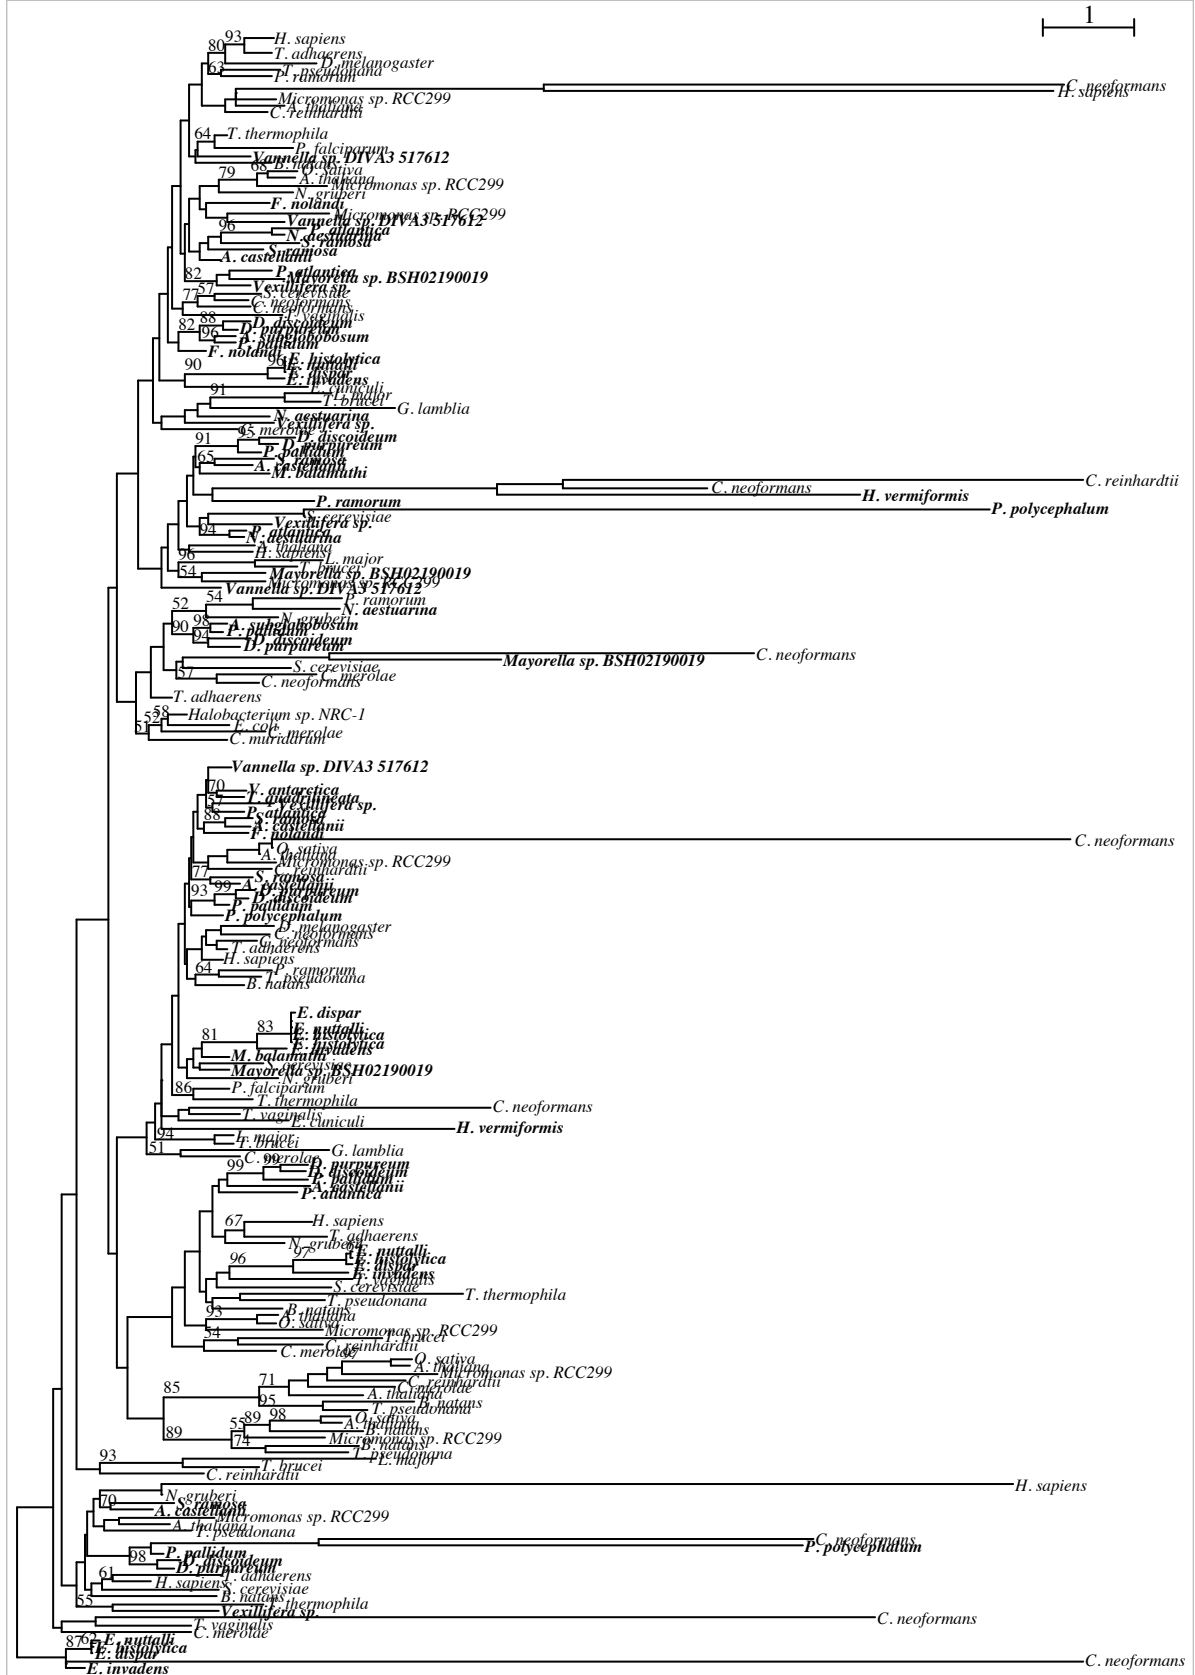

MSH2

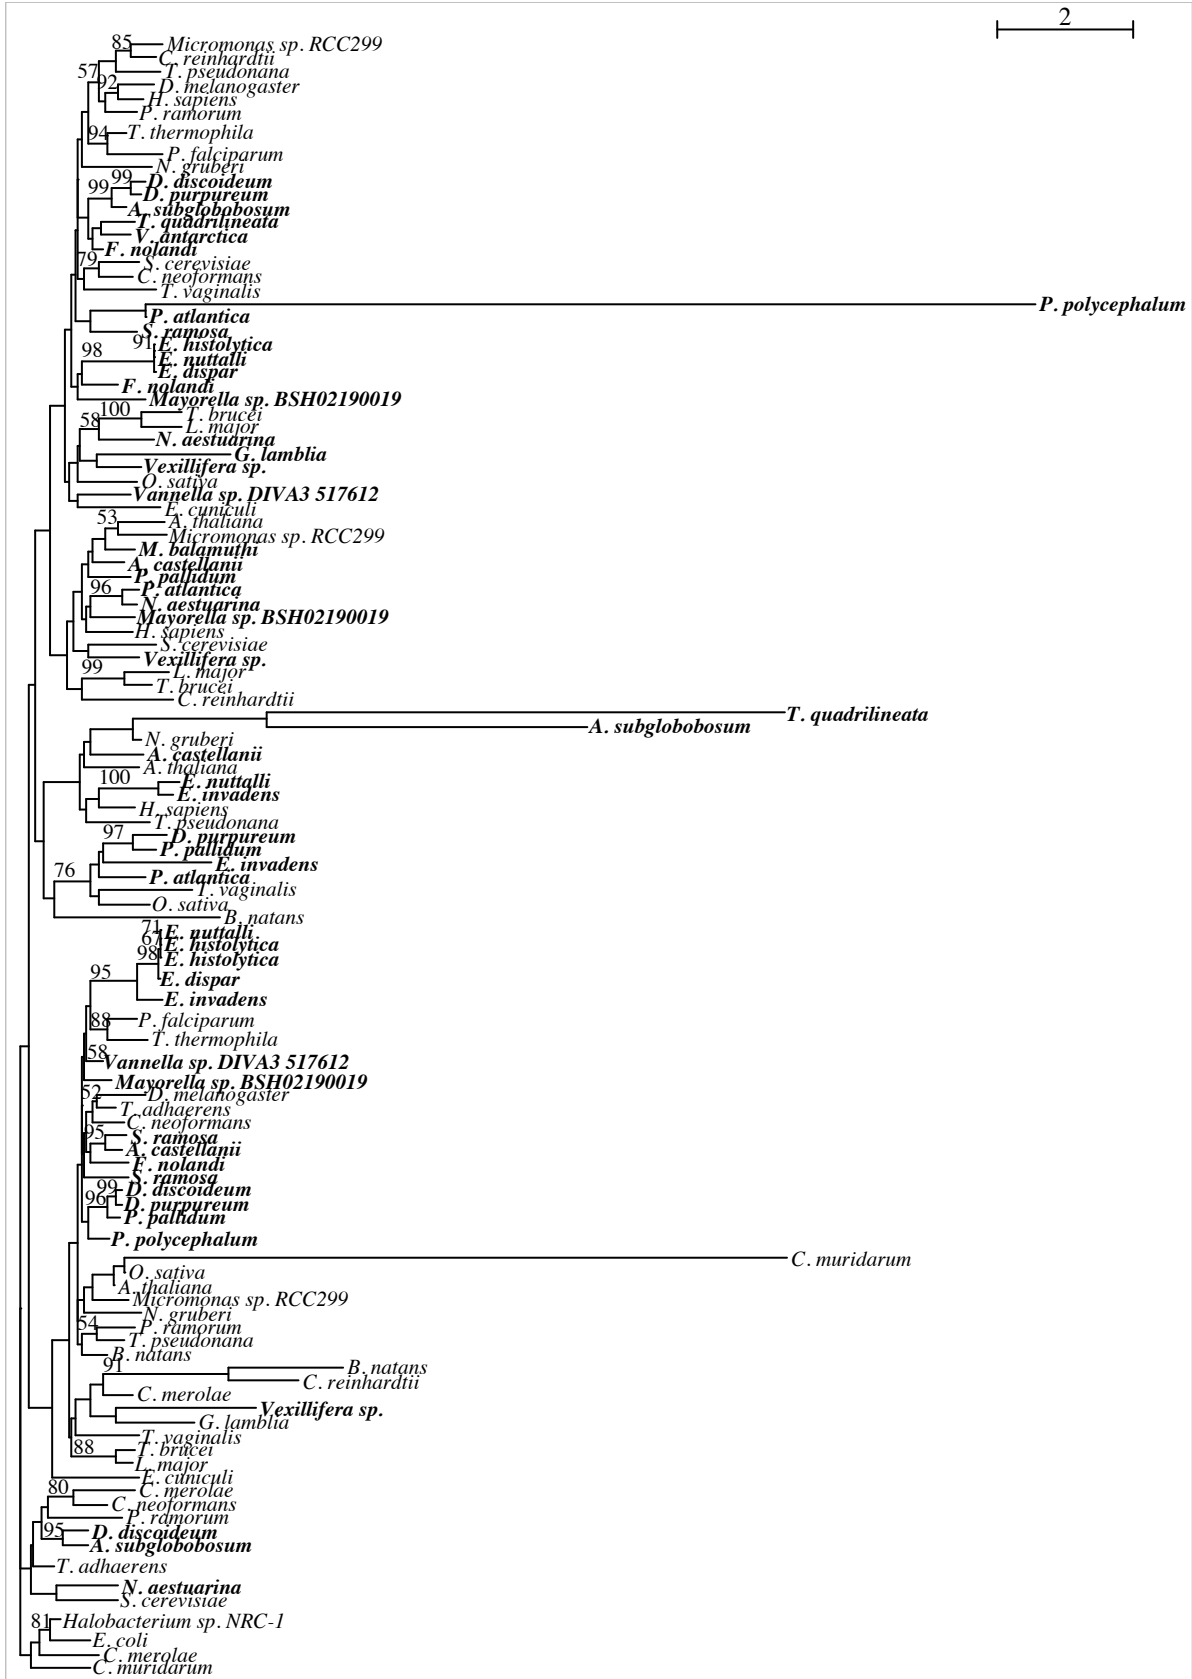

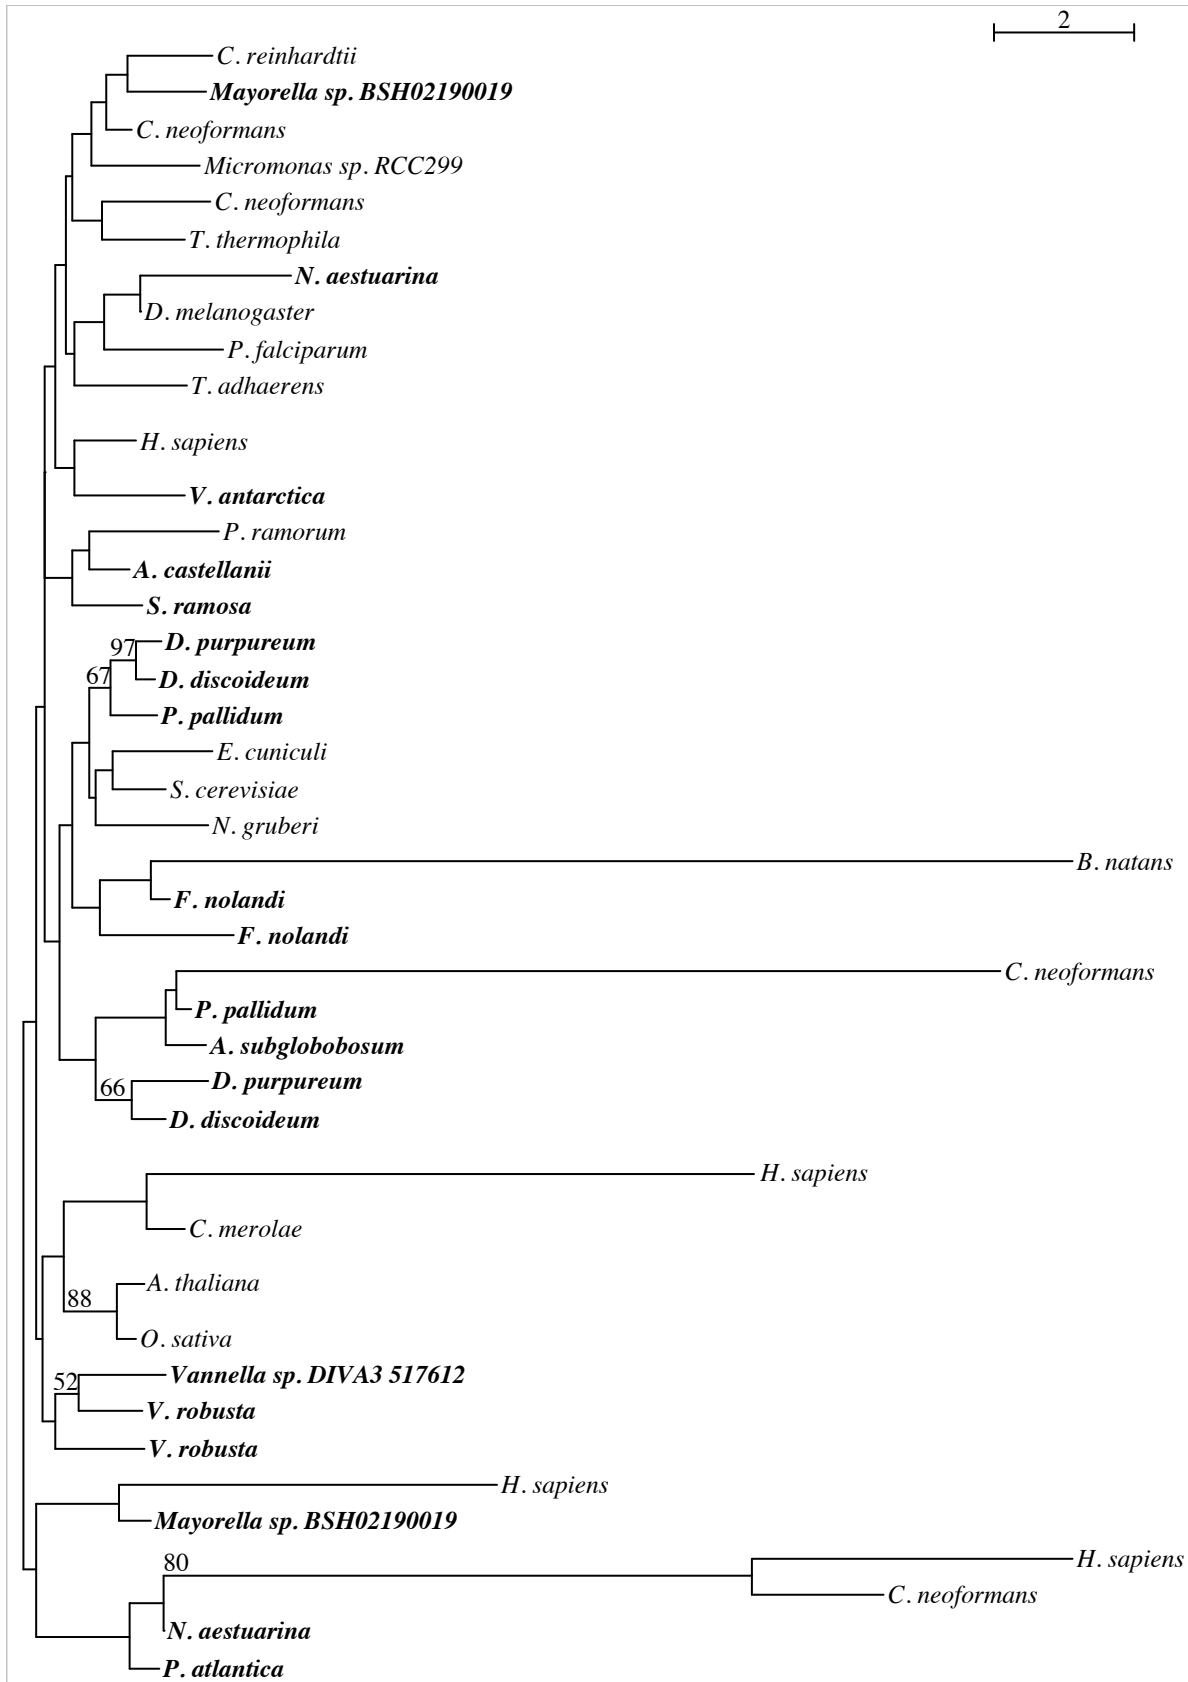

MUS81

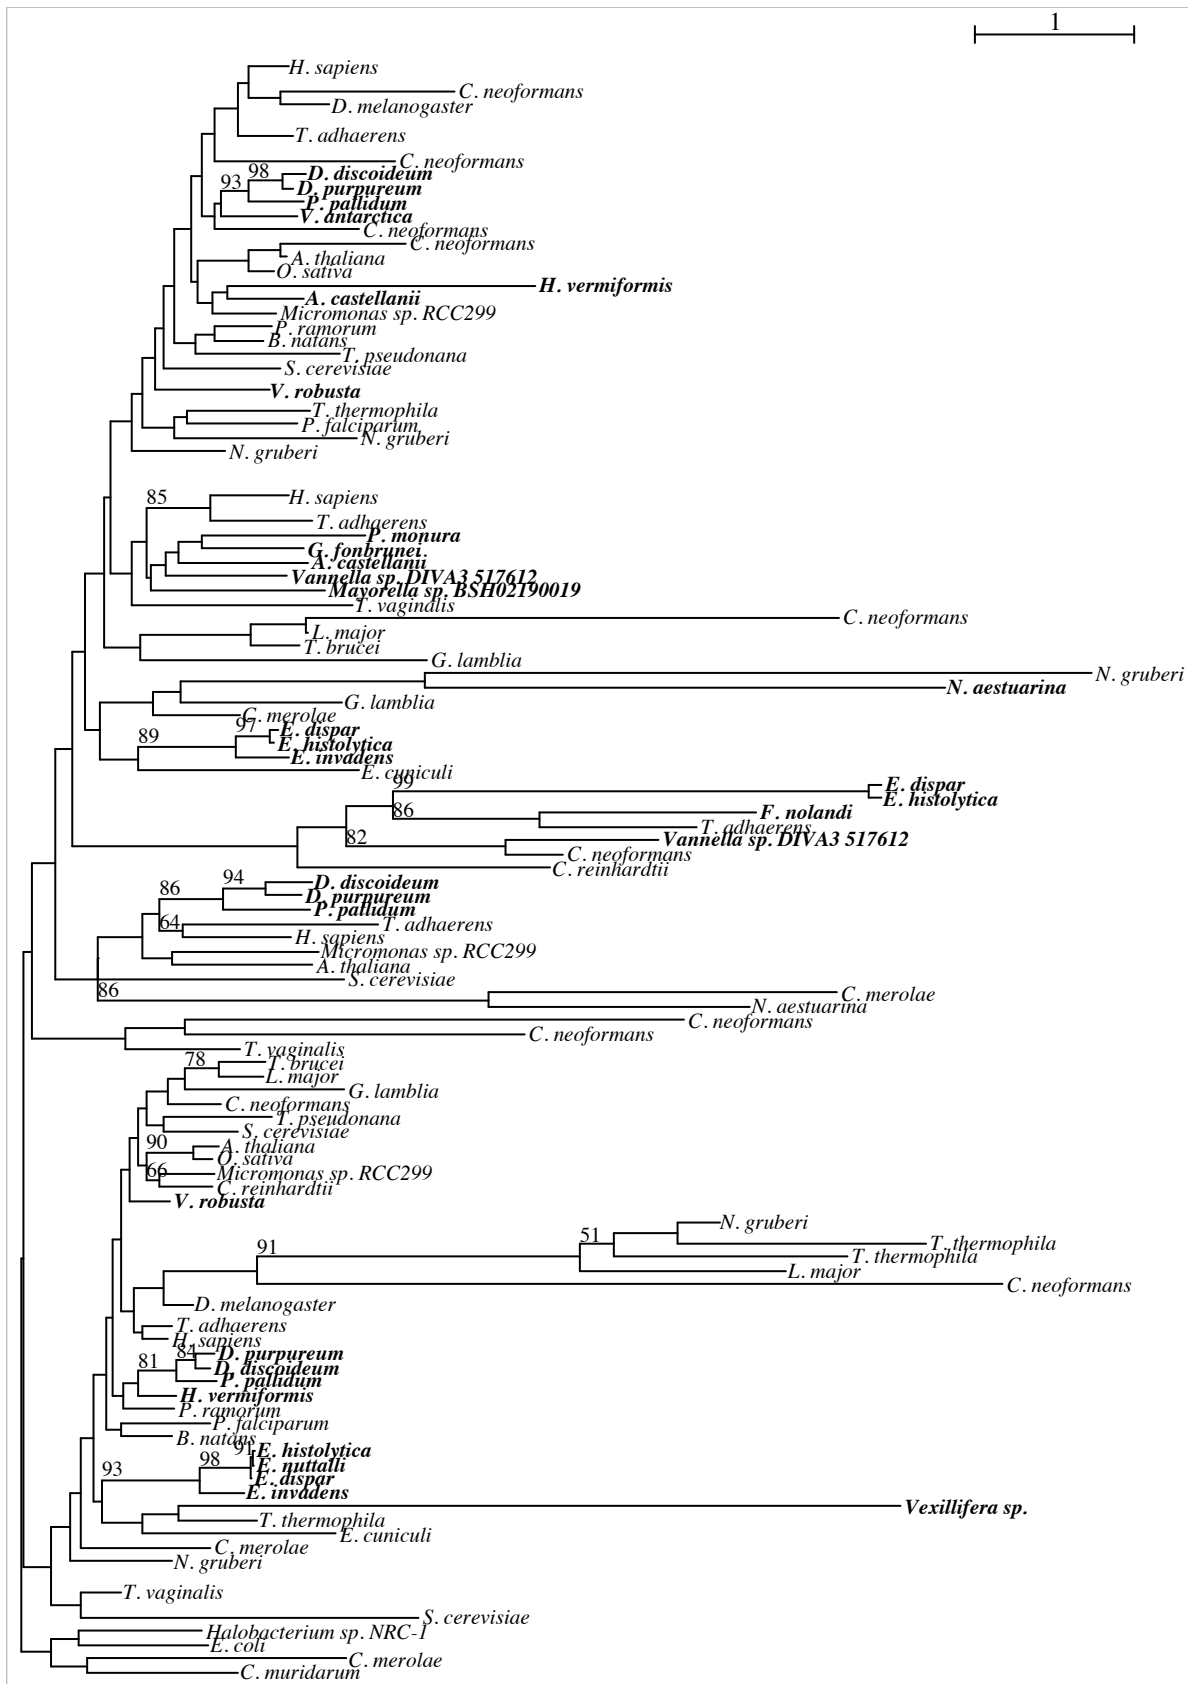

PMS1

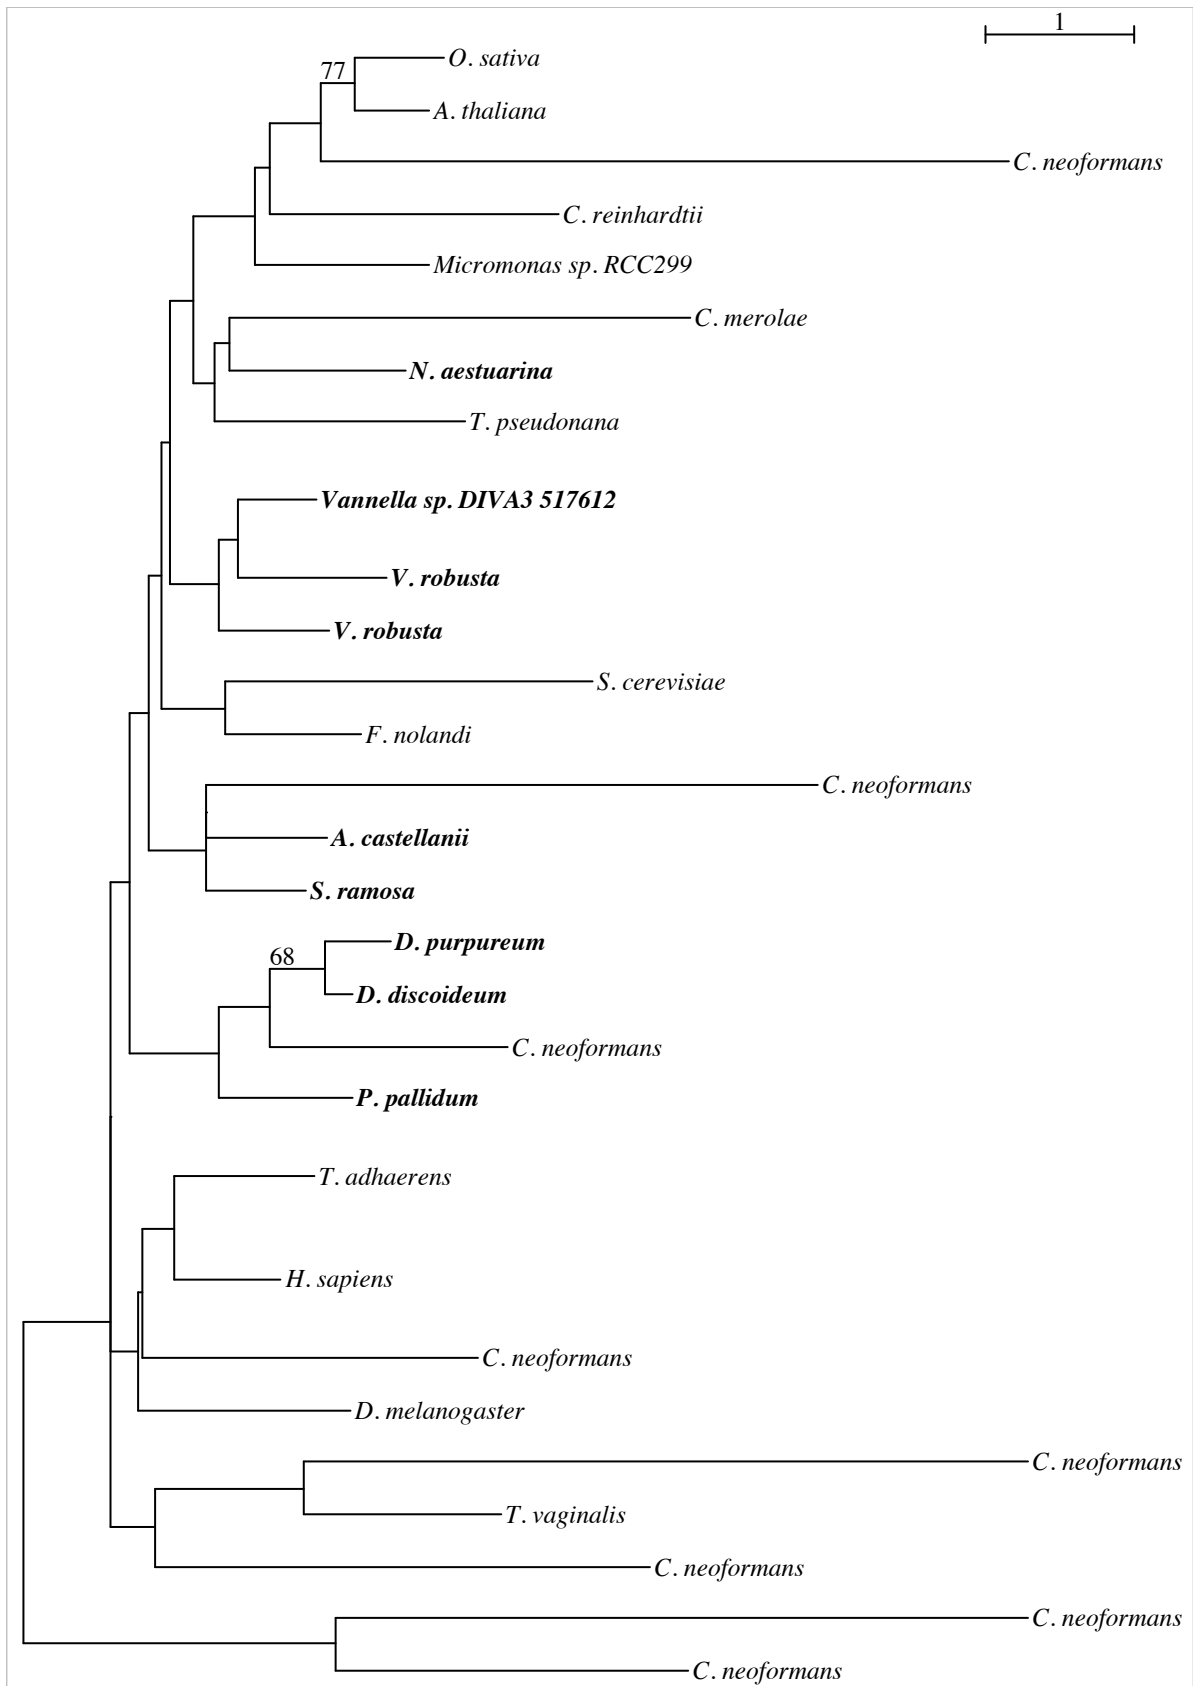

RAD17



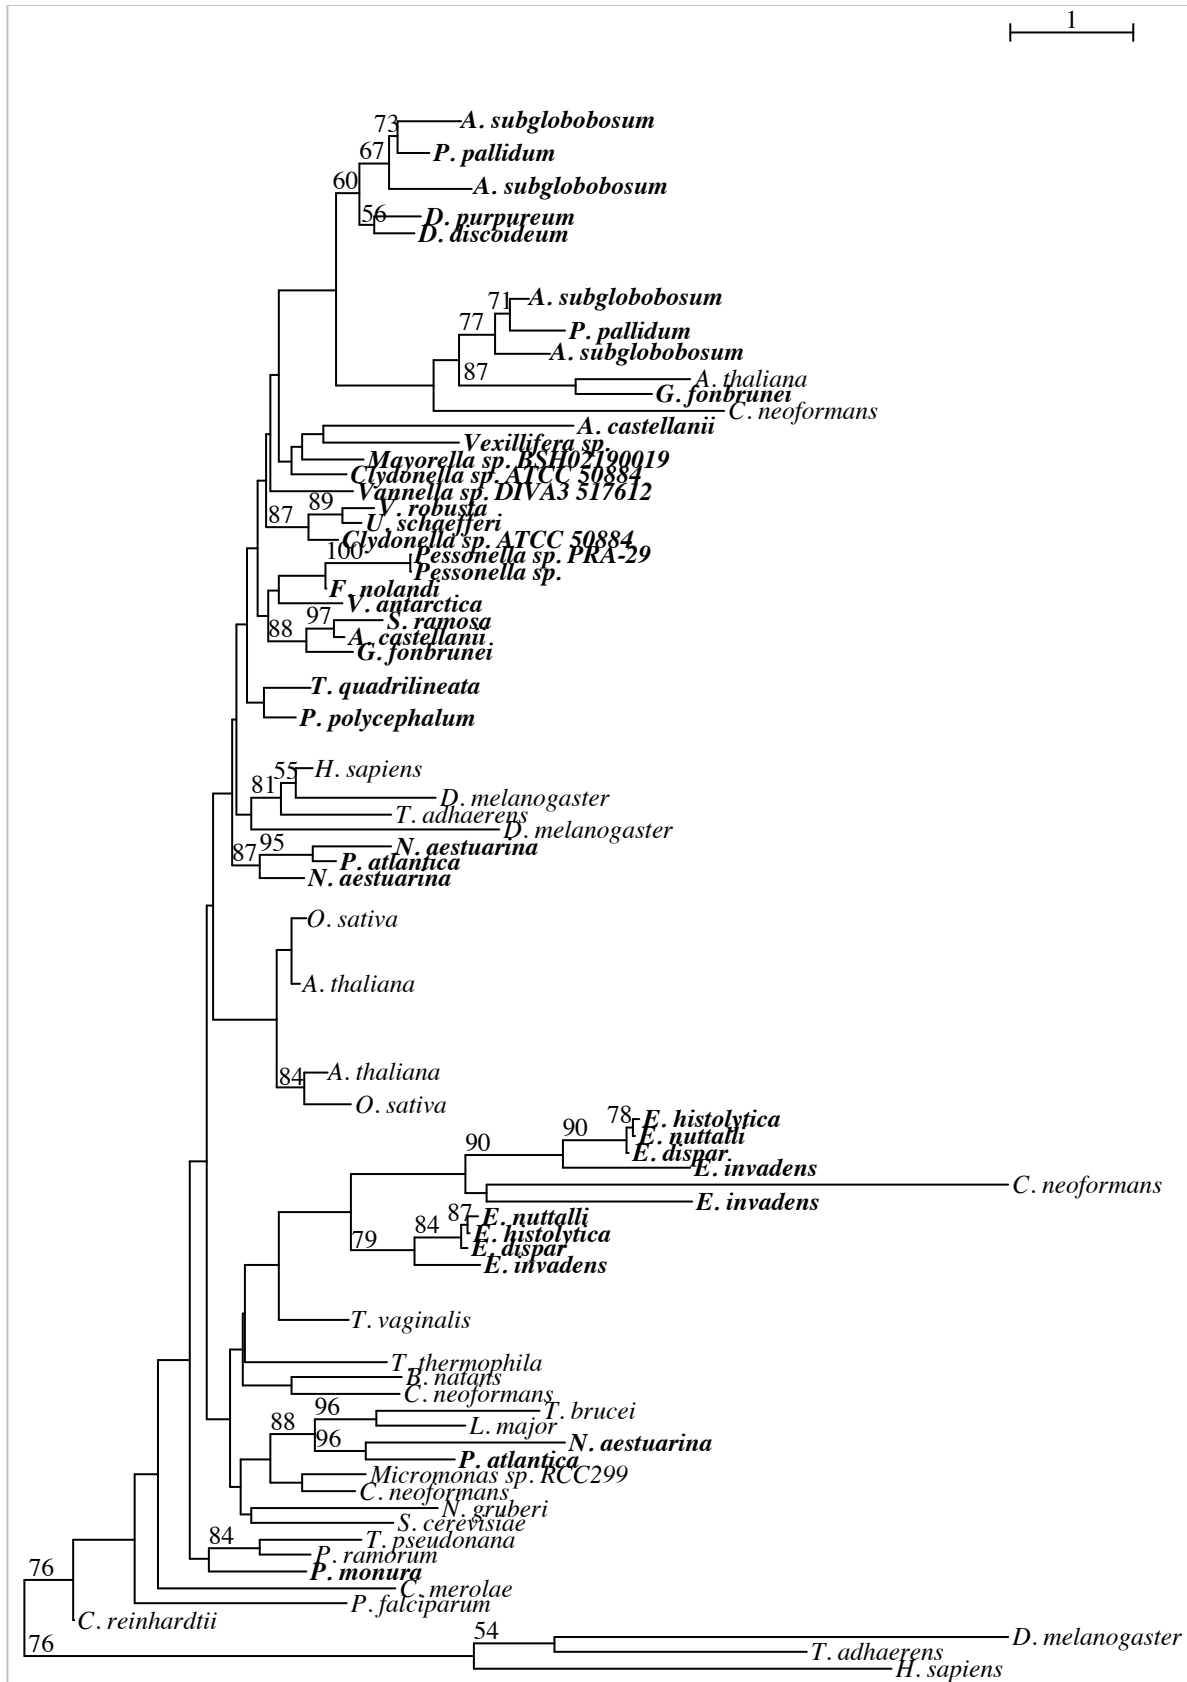

RAD24

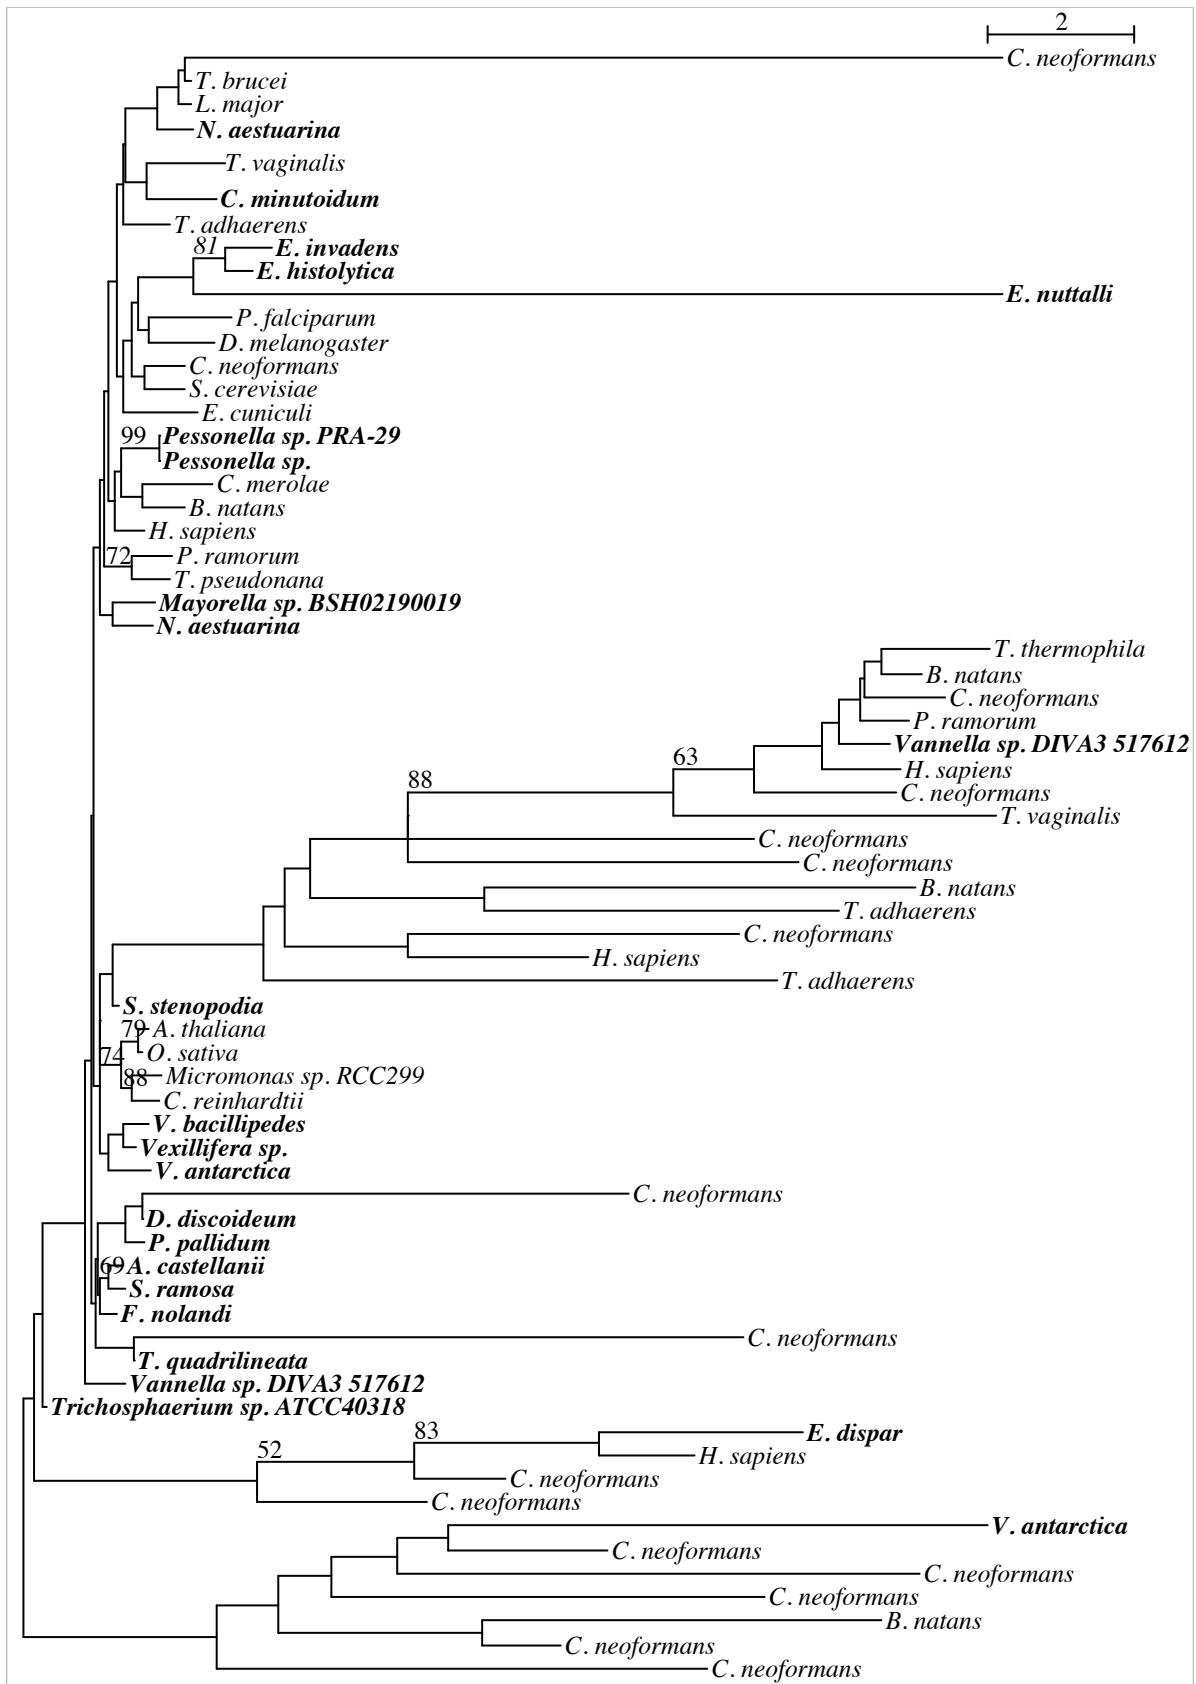

RAD50

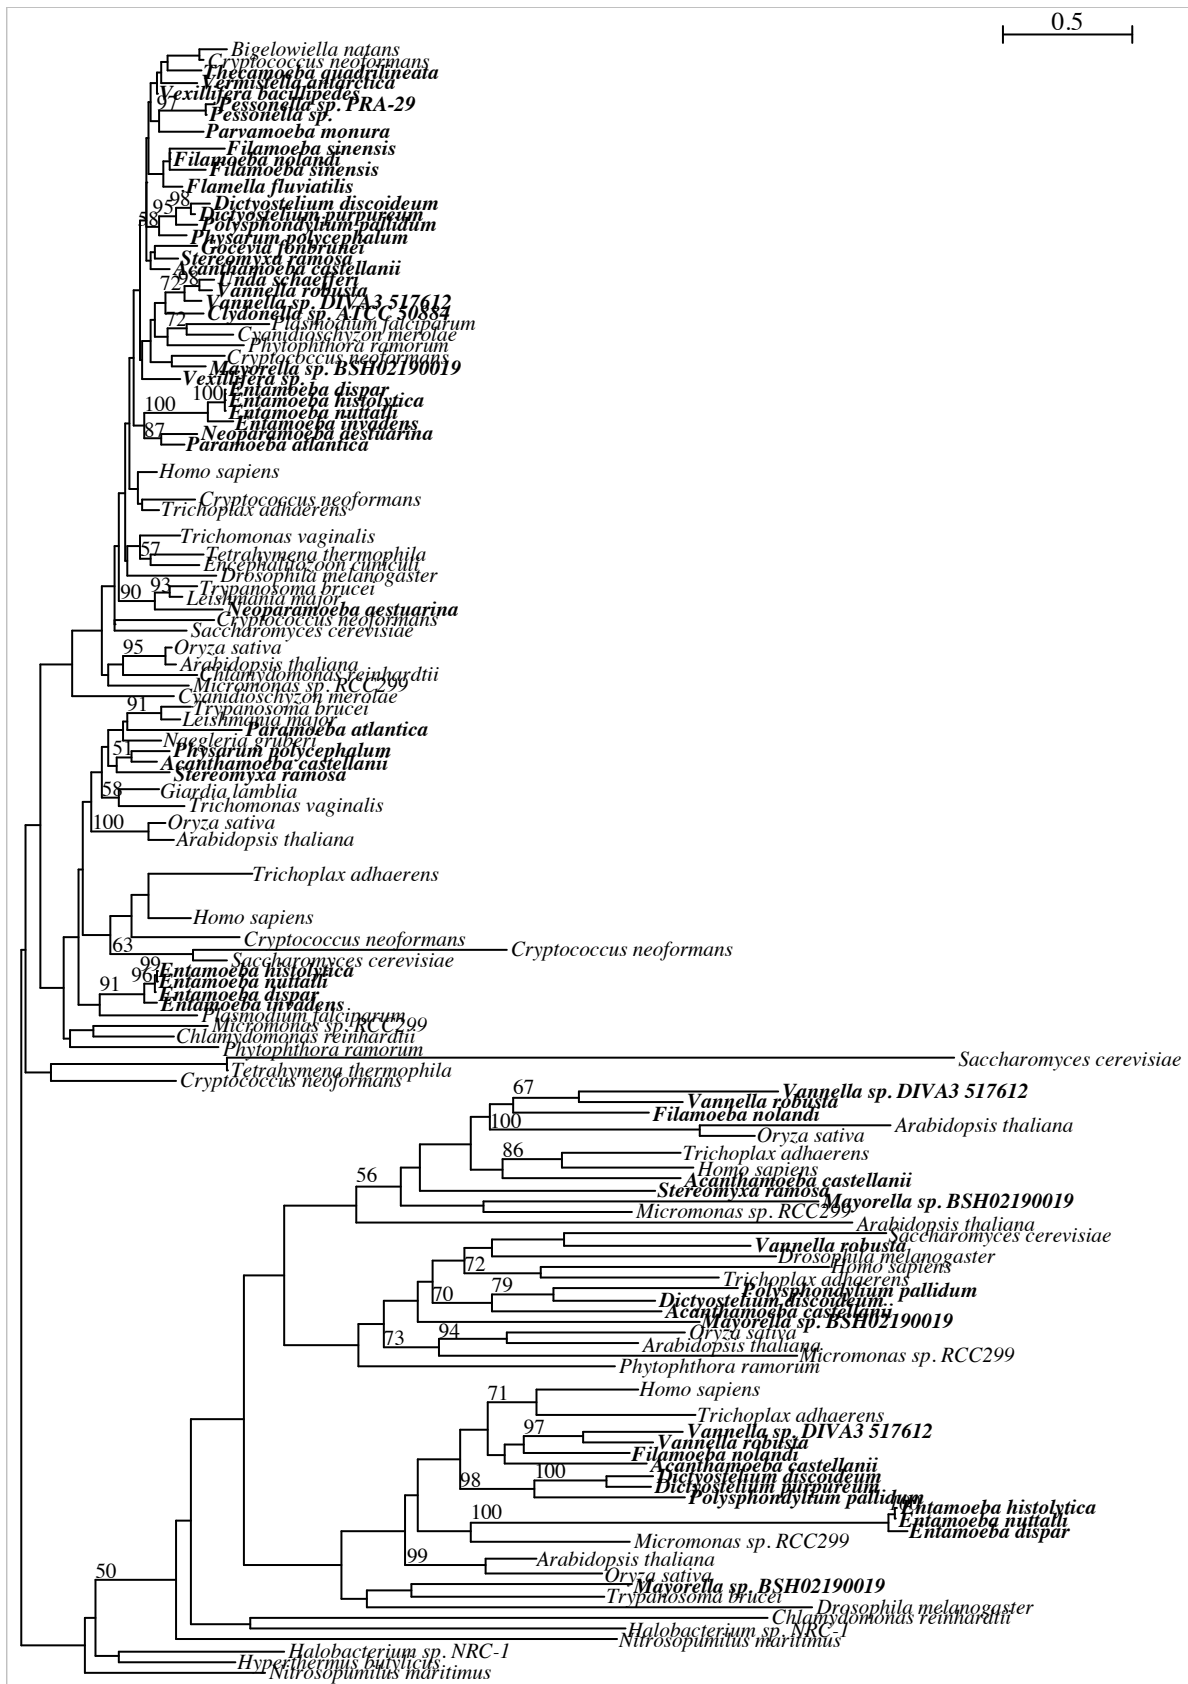

RAD51

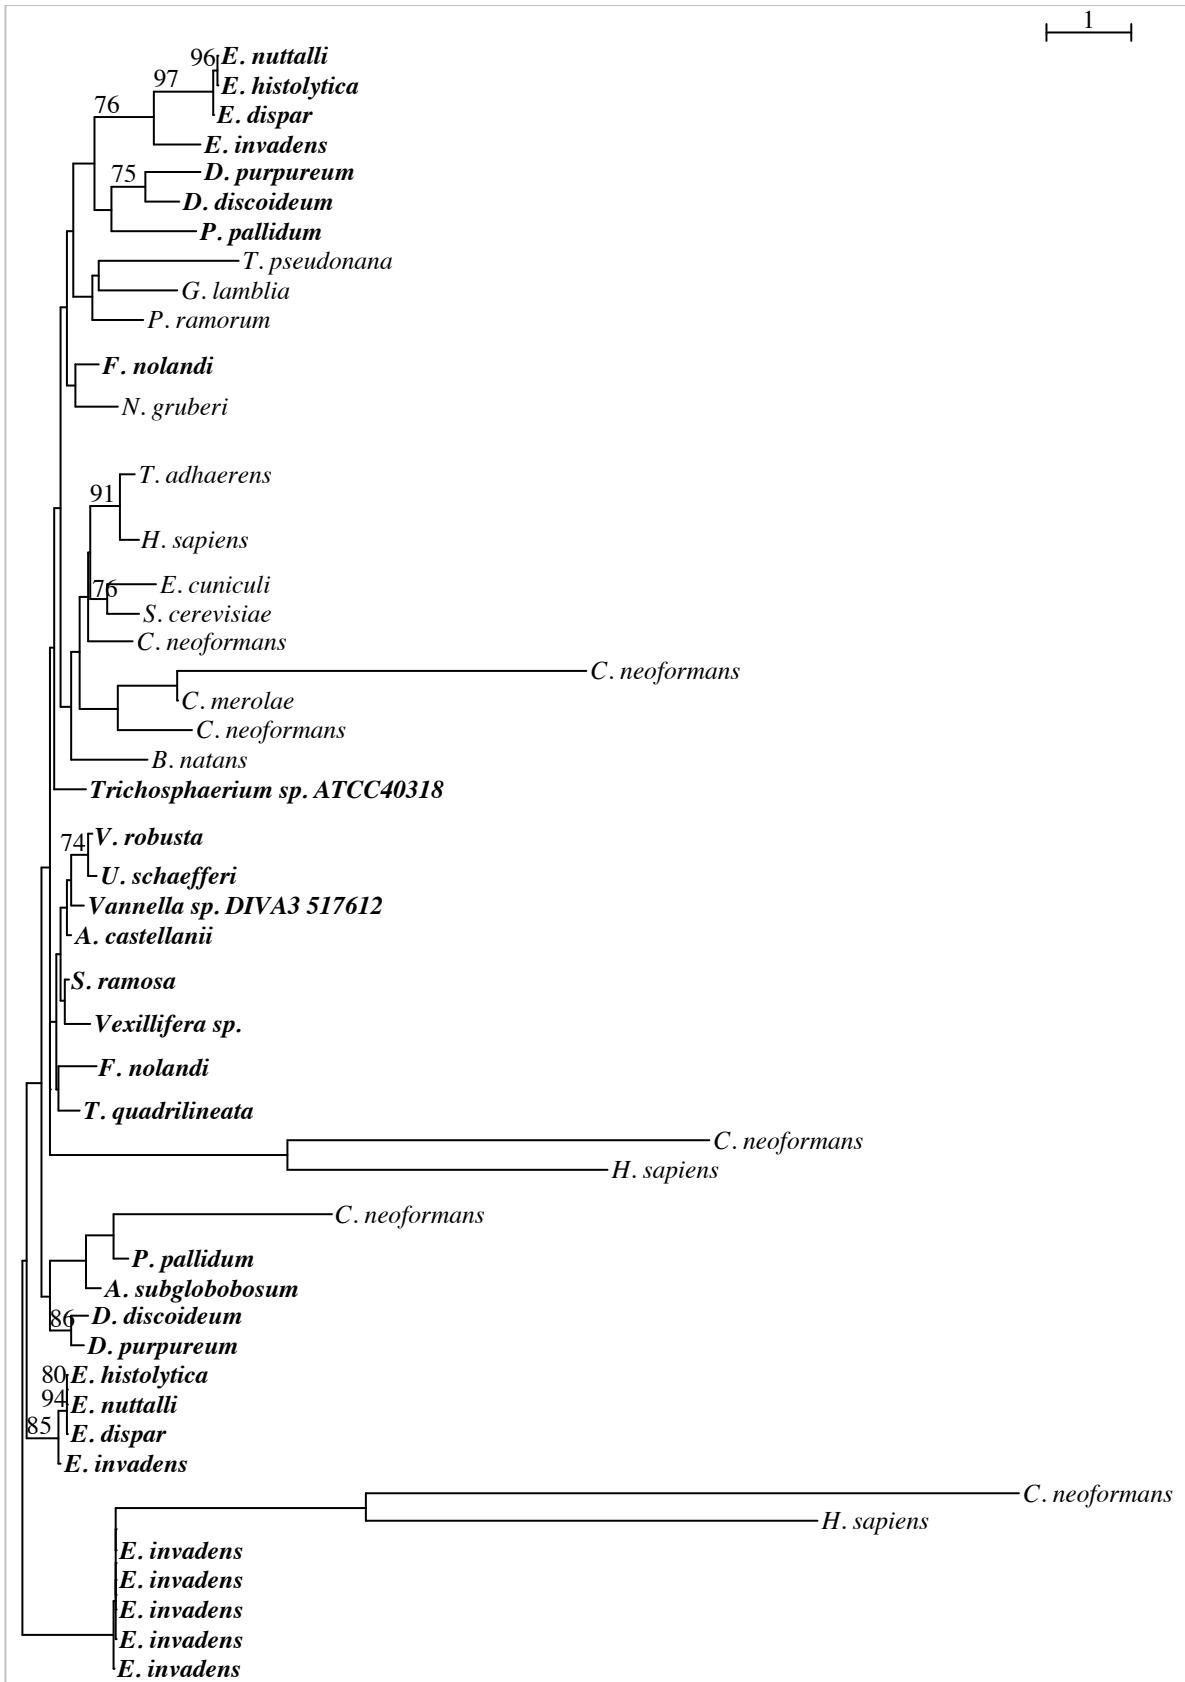

RAD52

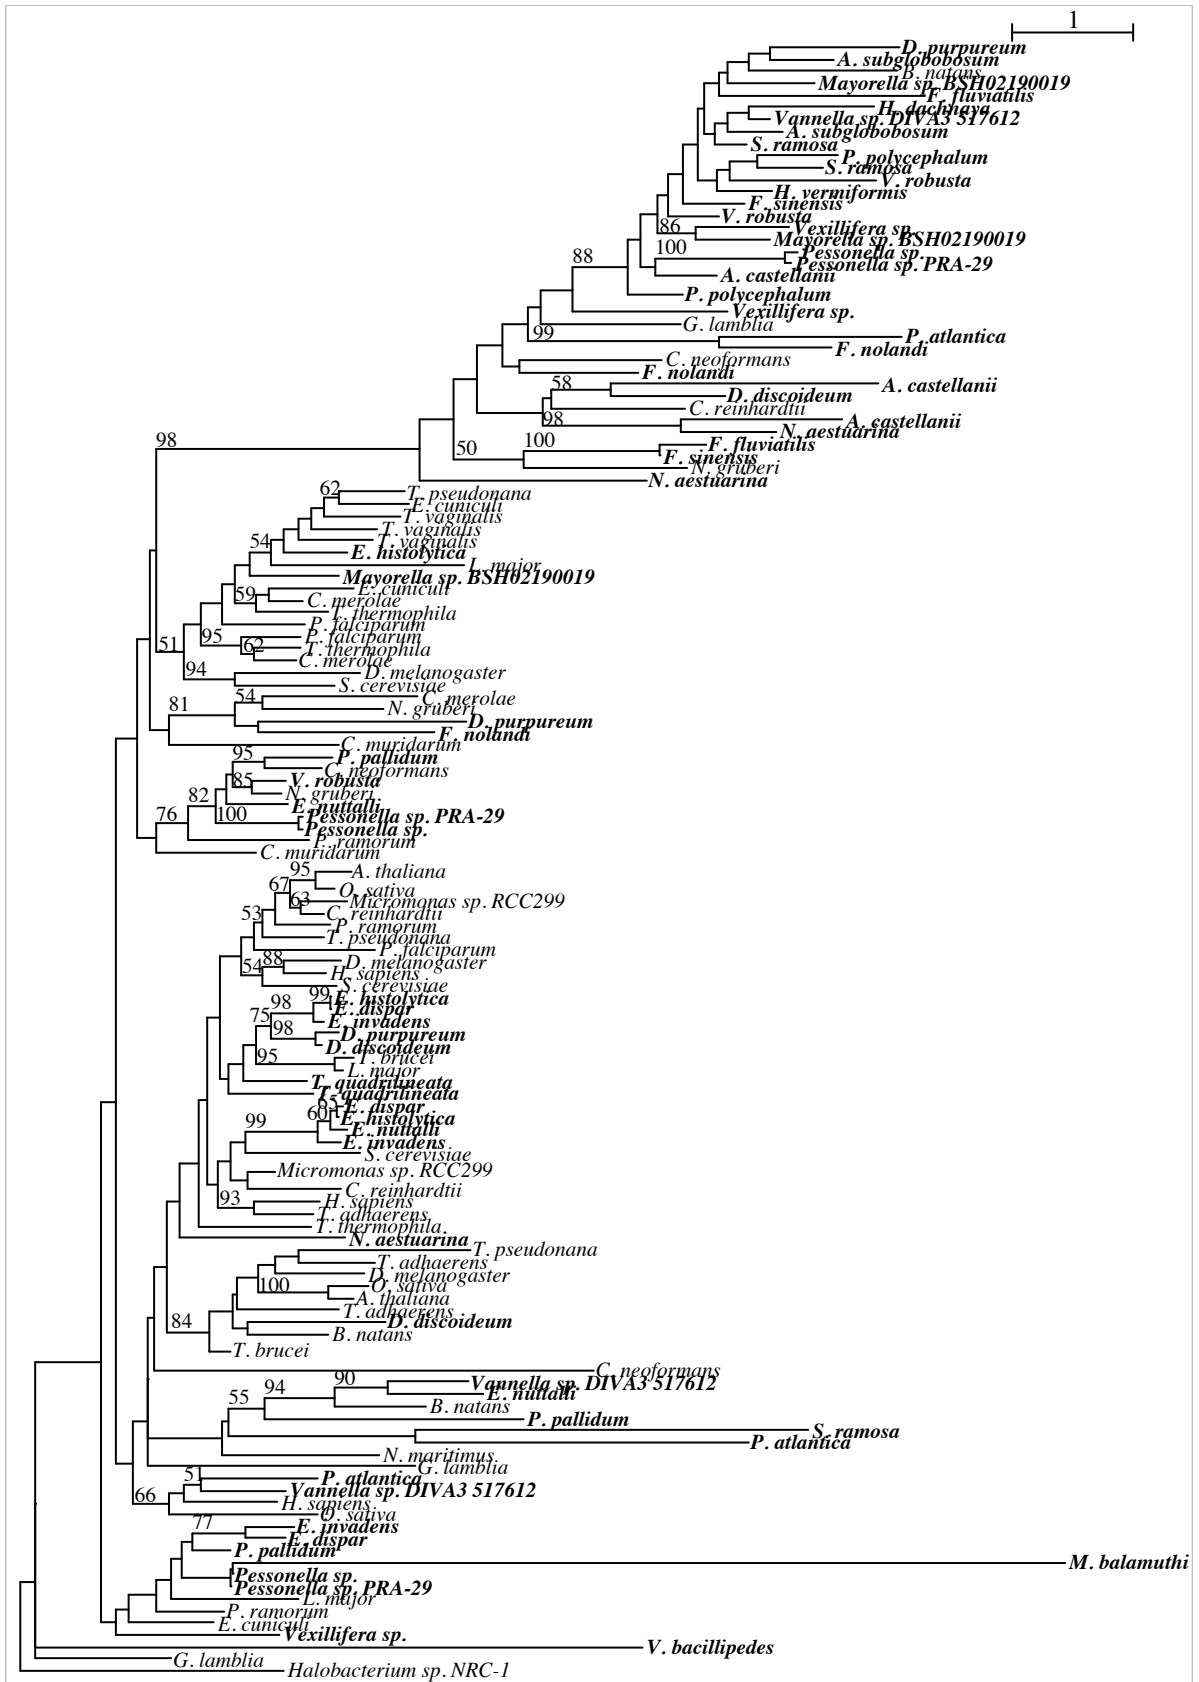

RAD54

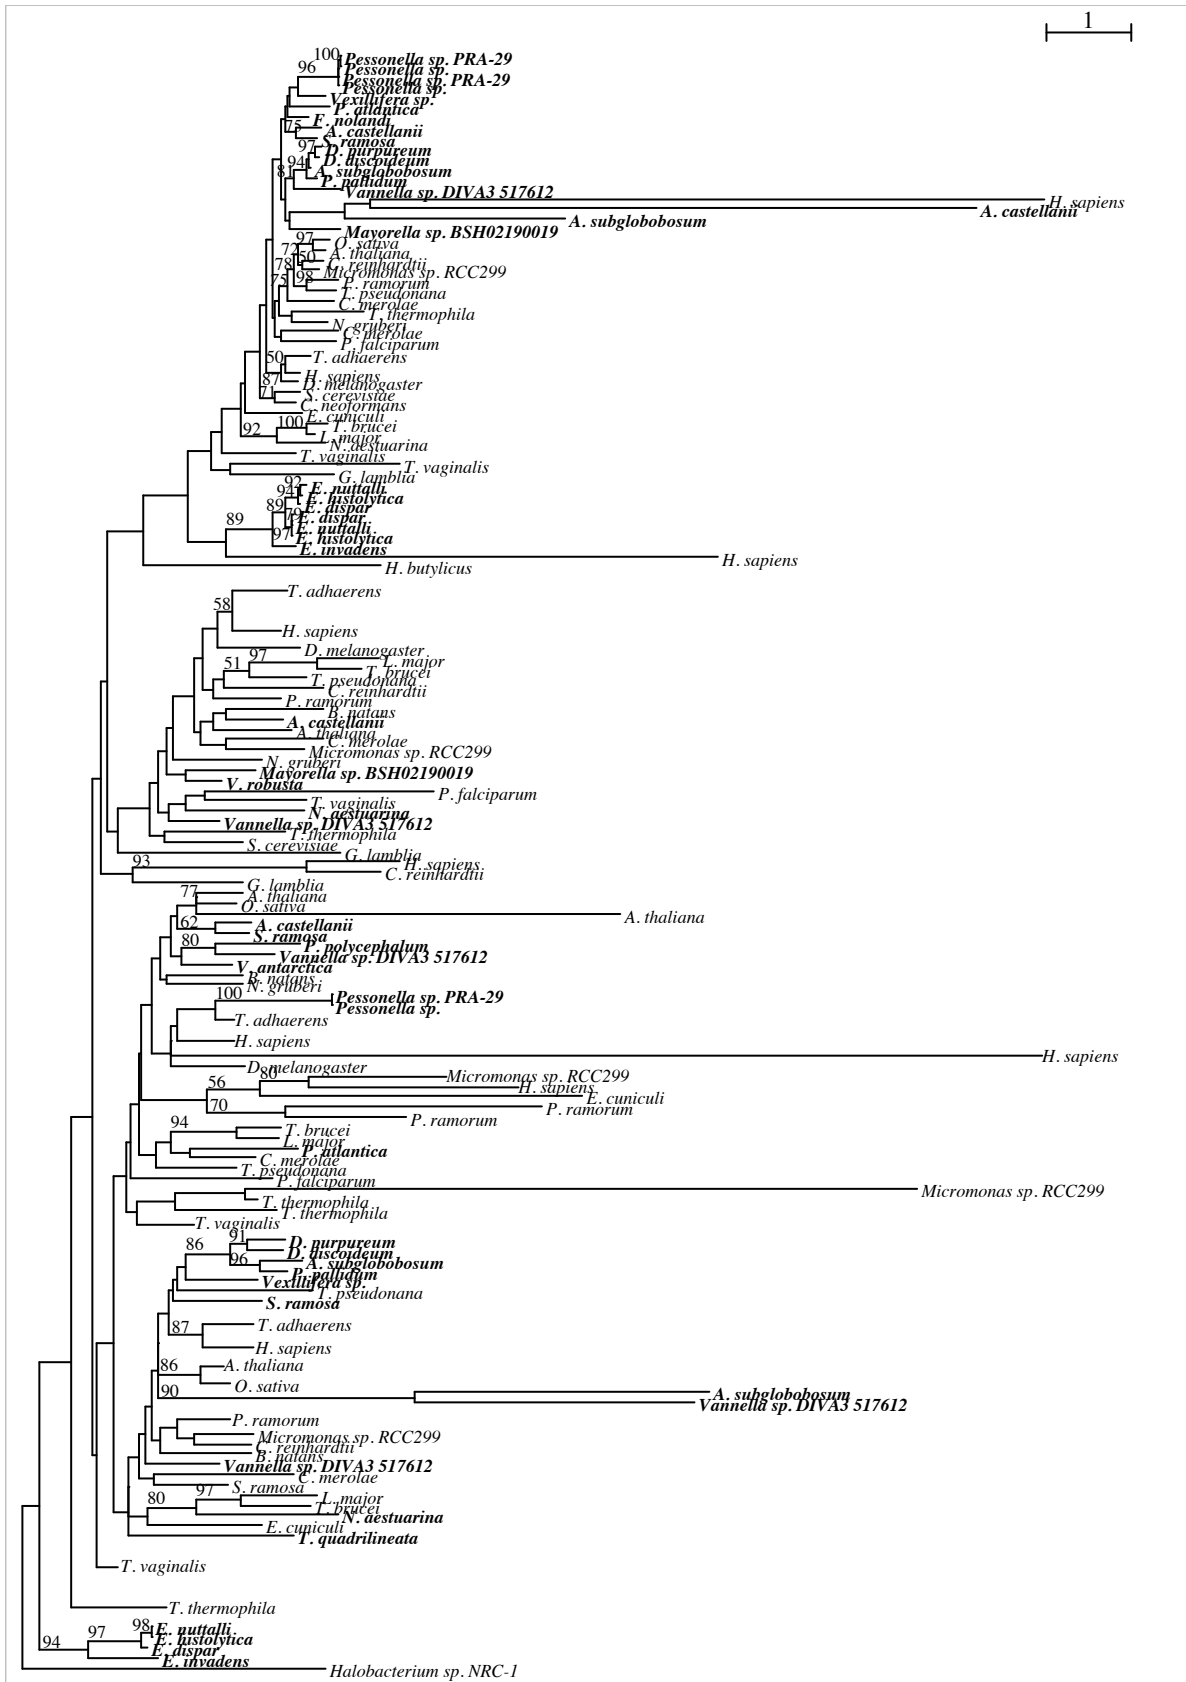

RTEL1

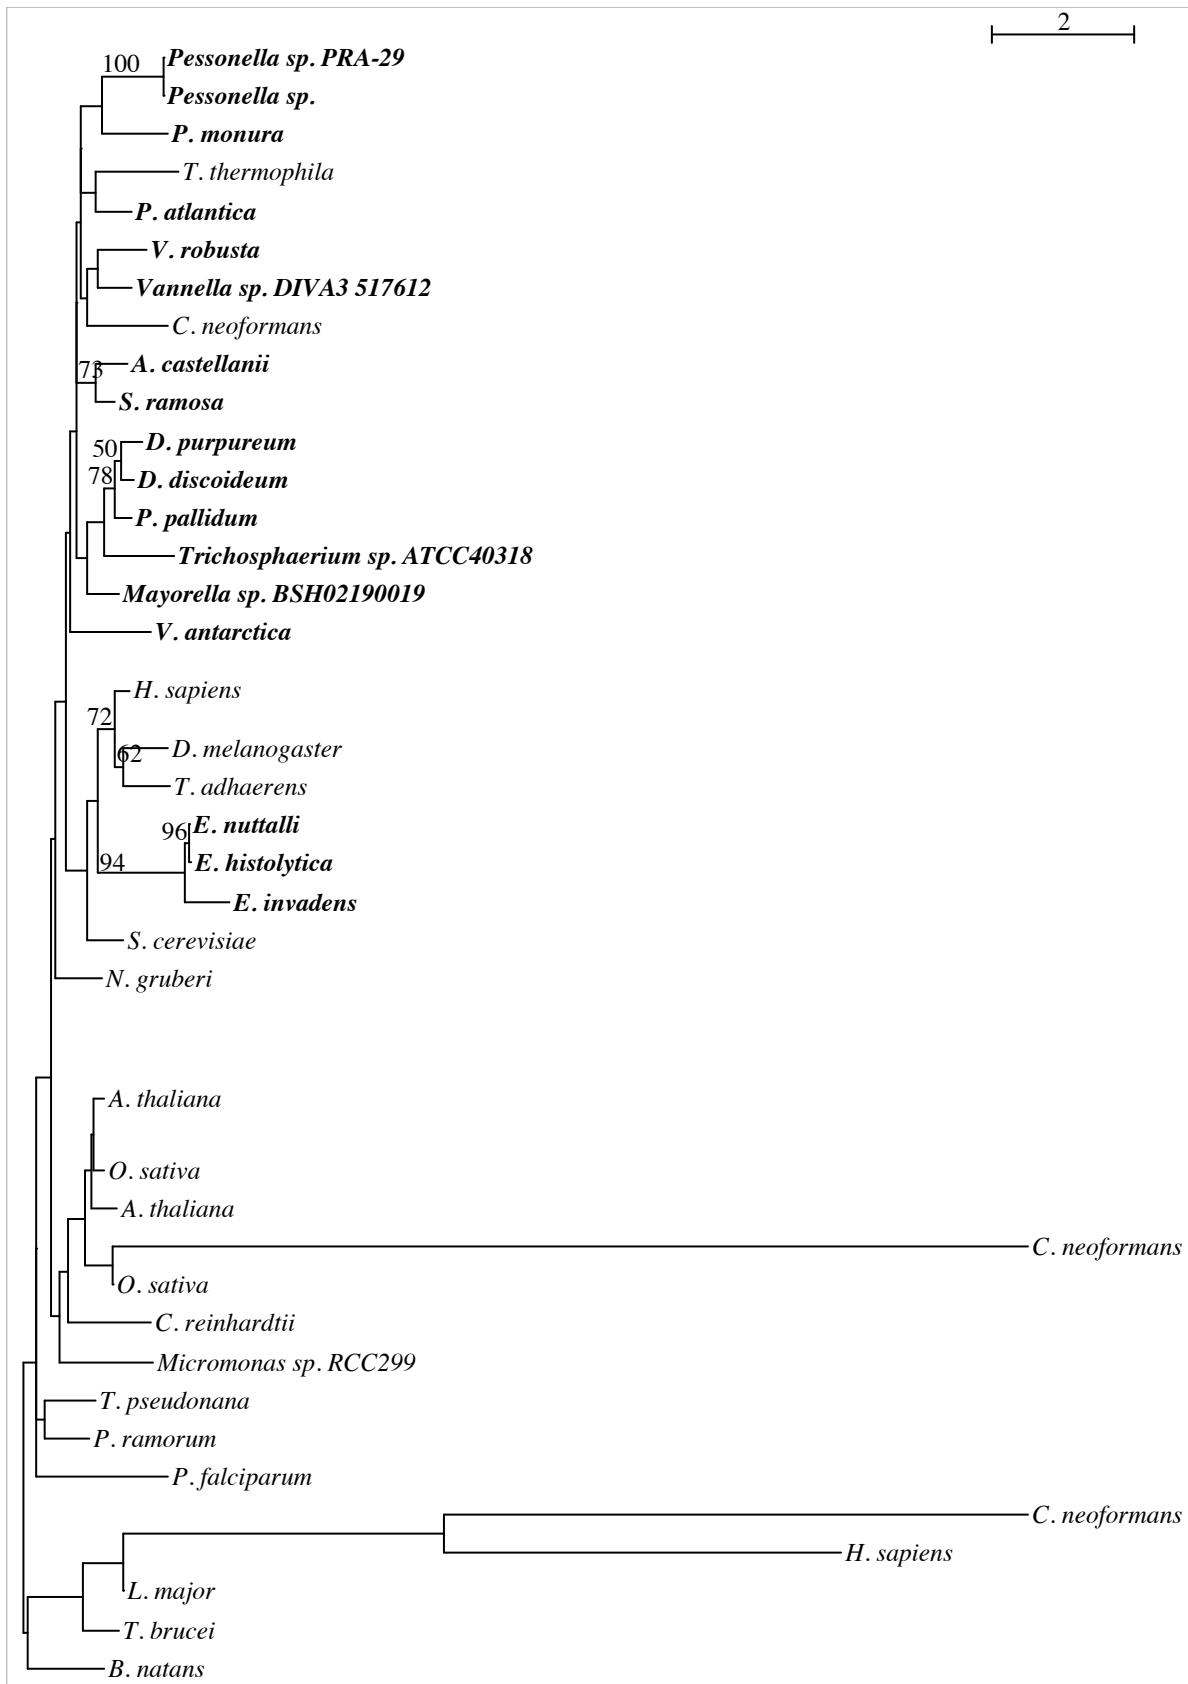

SAD1 like

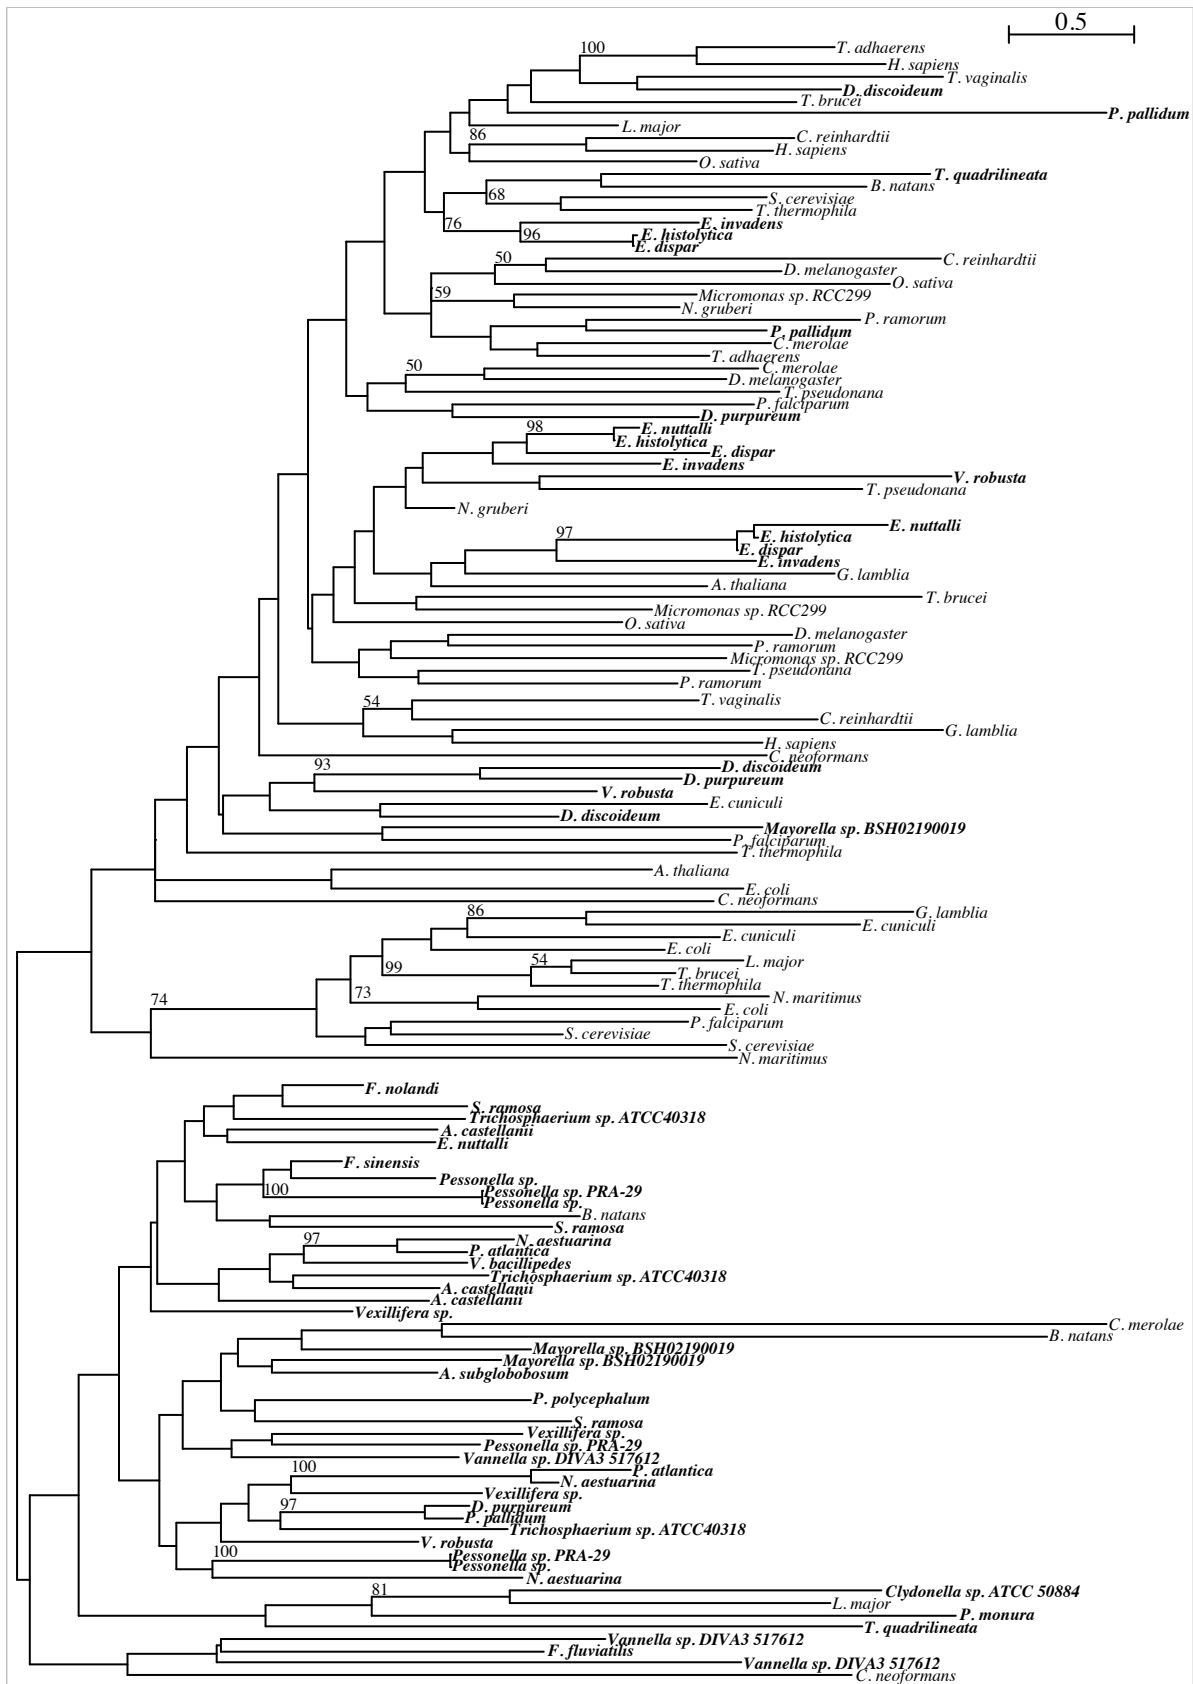

SGS1



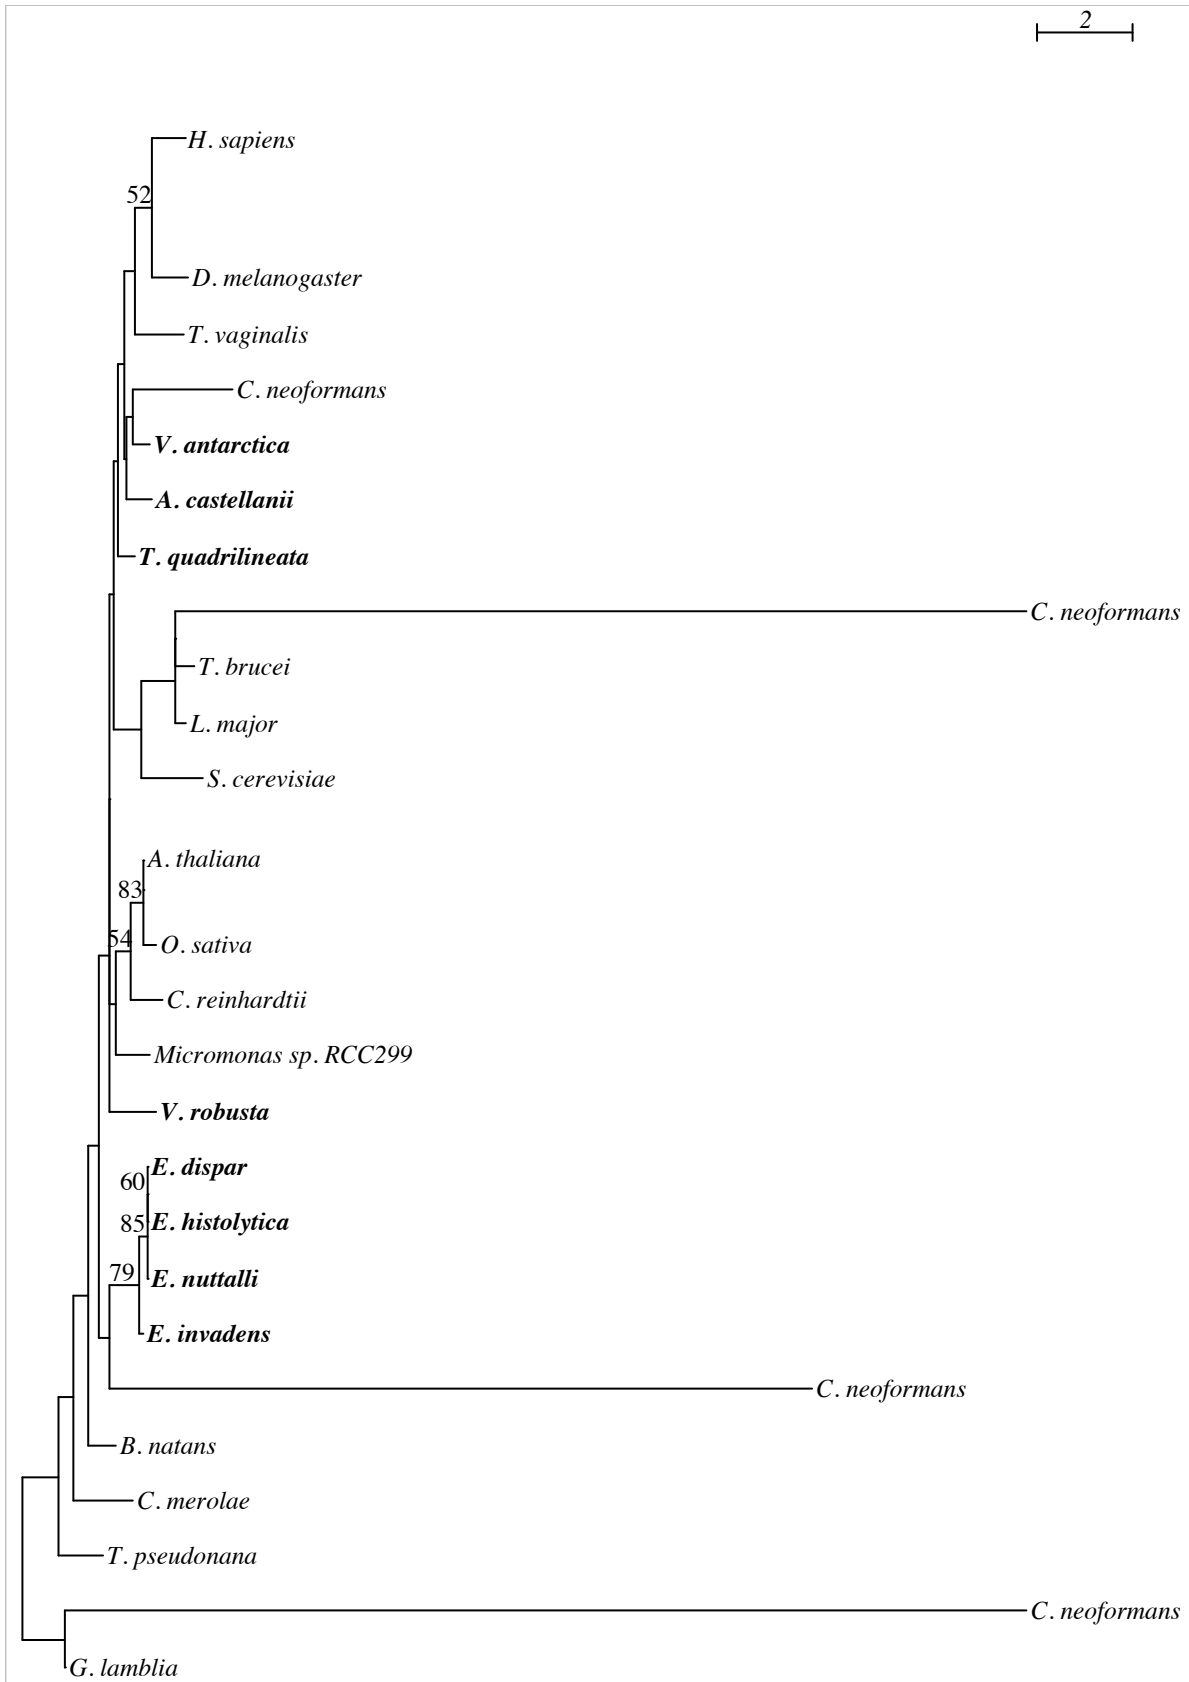

SLX1

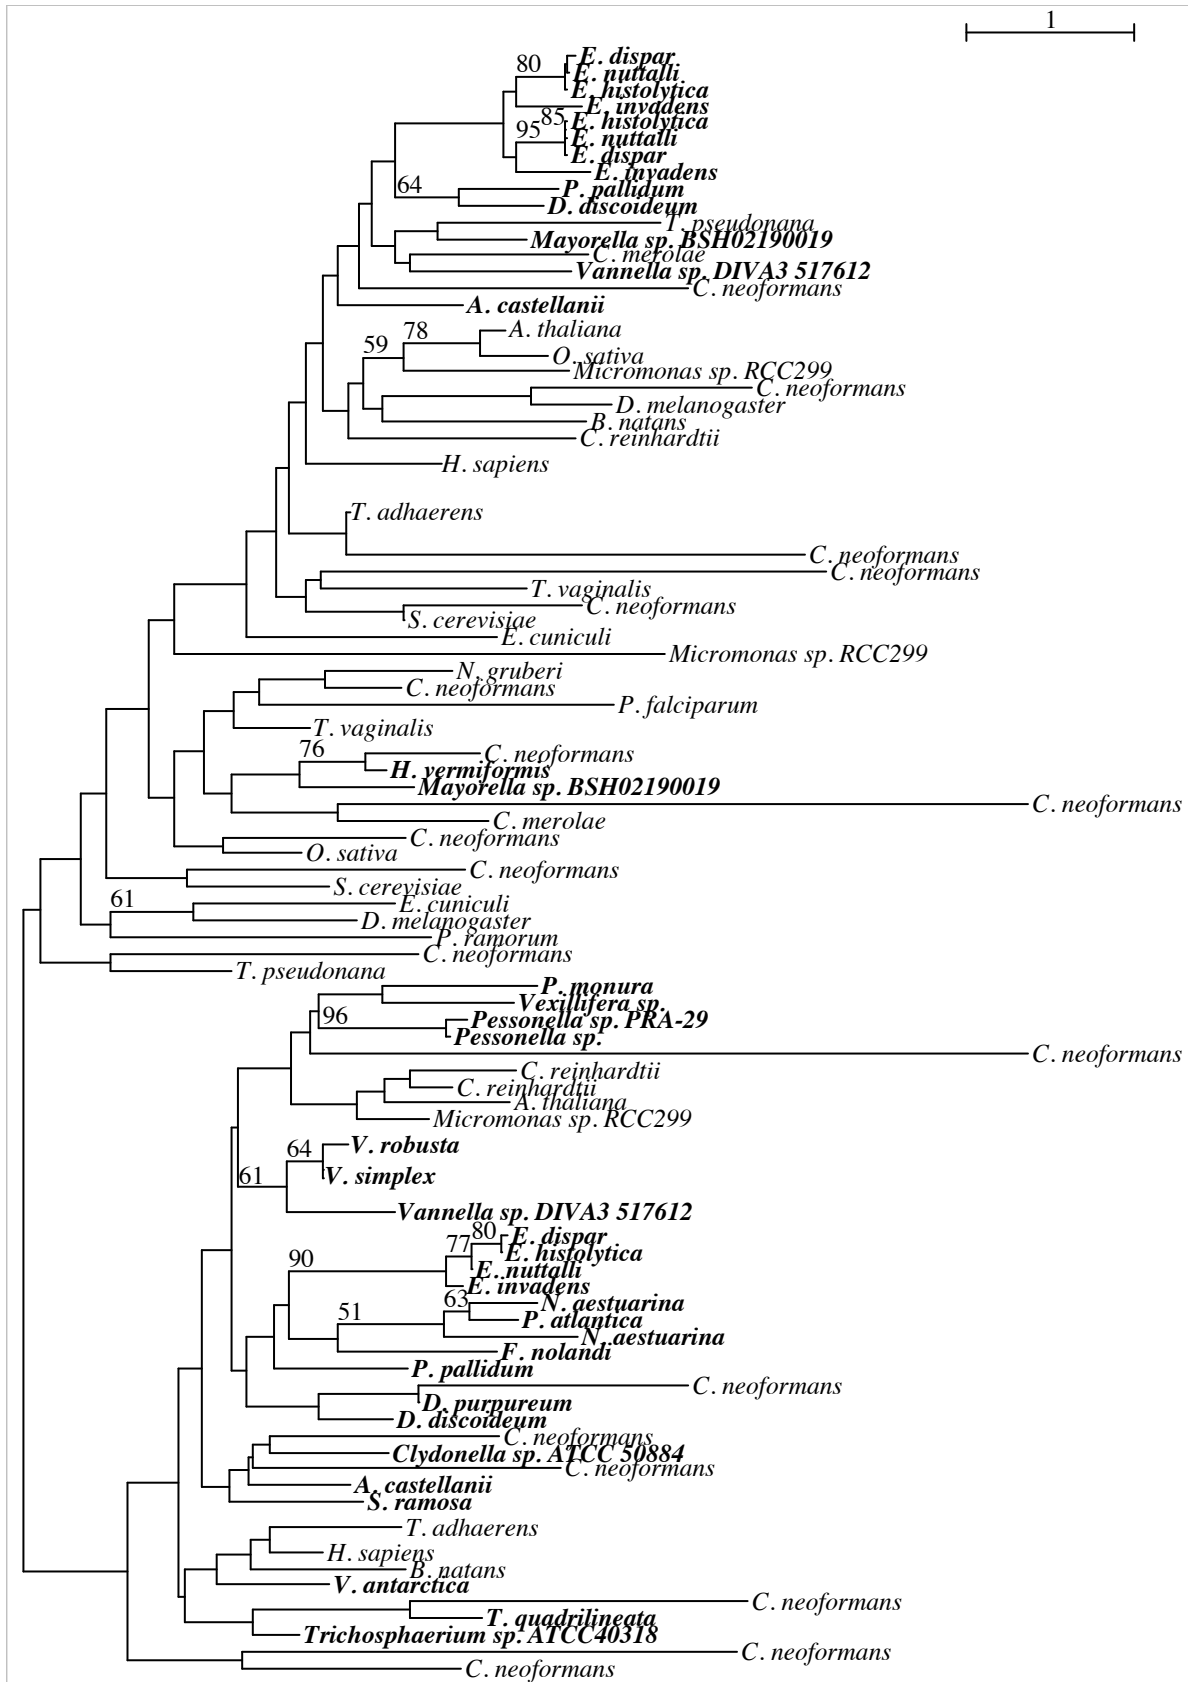

SMC5

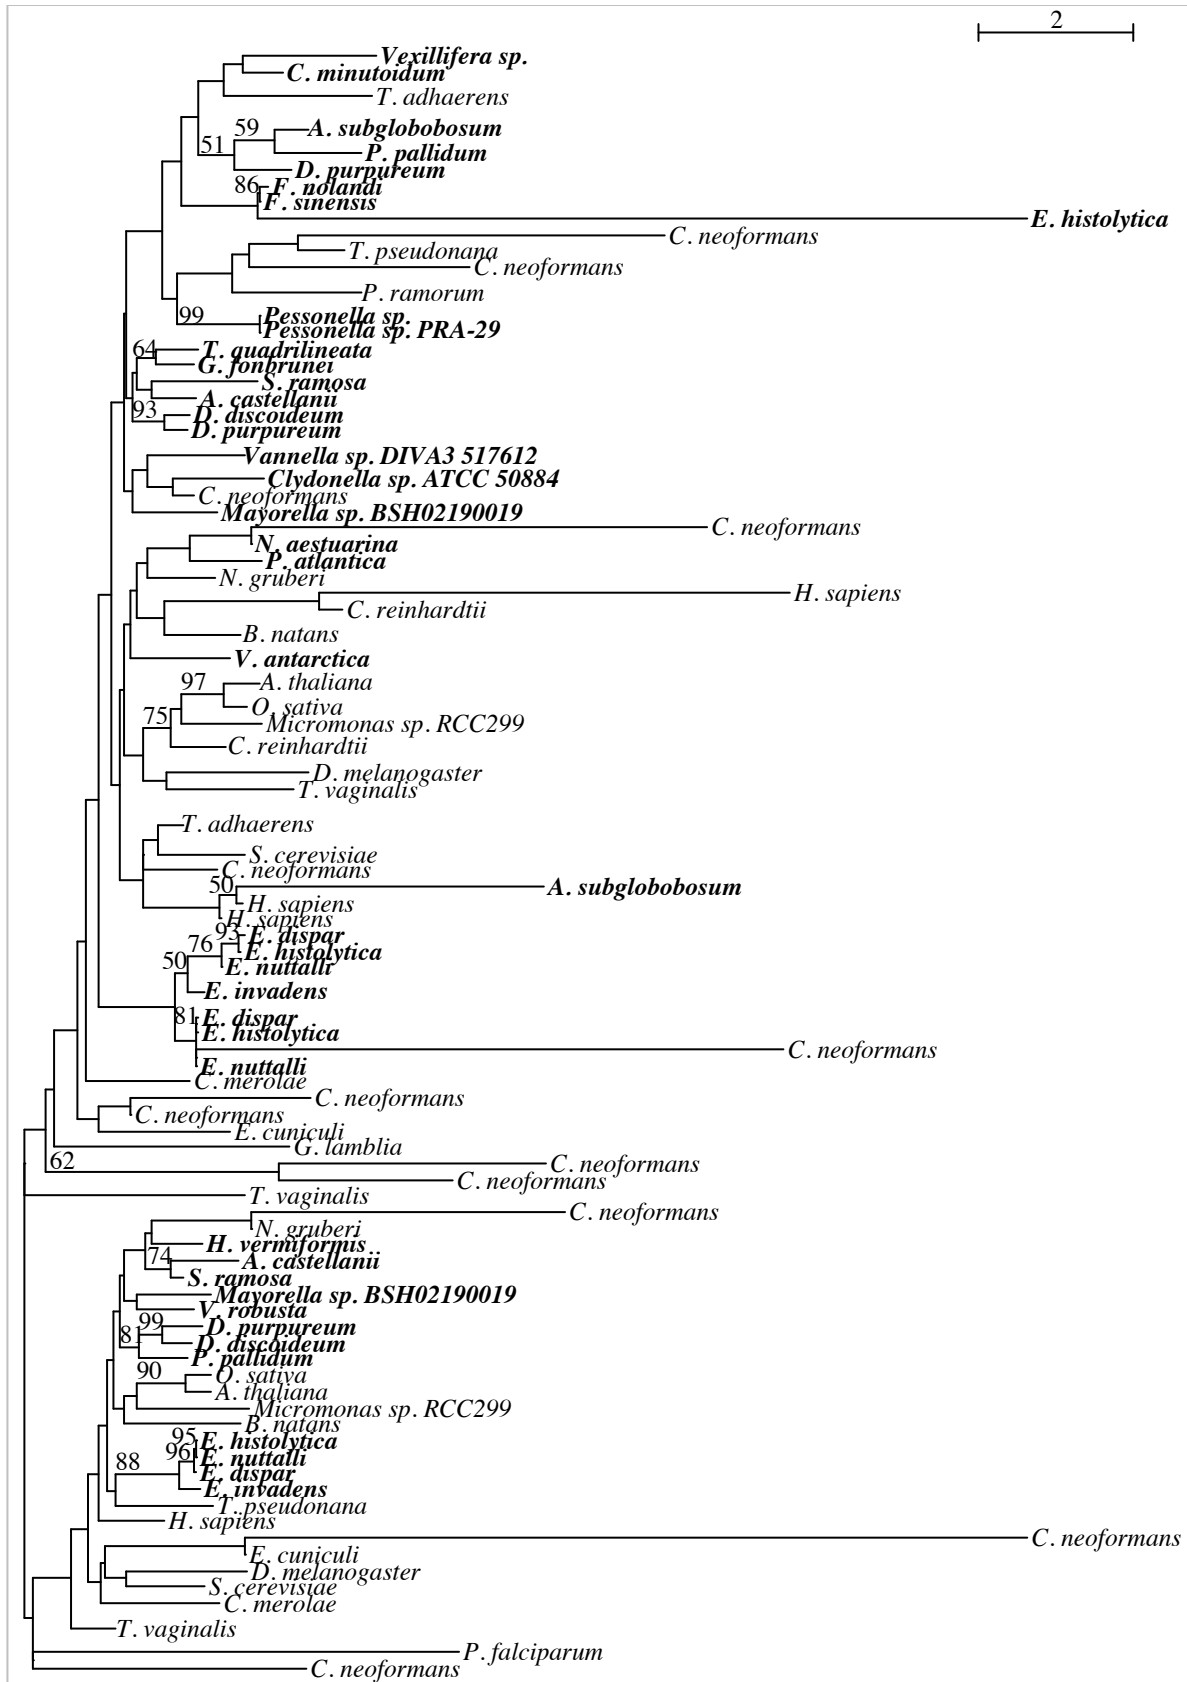

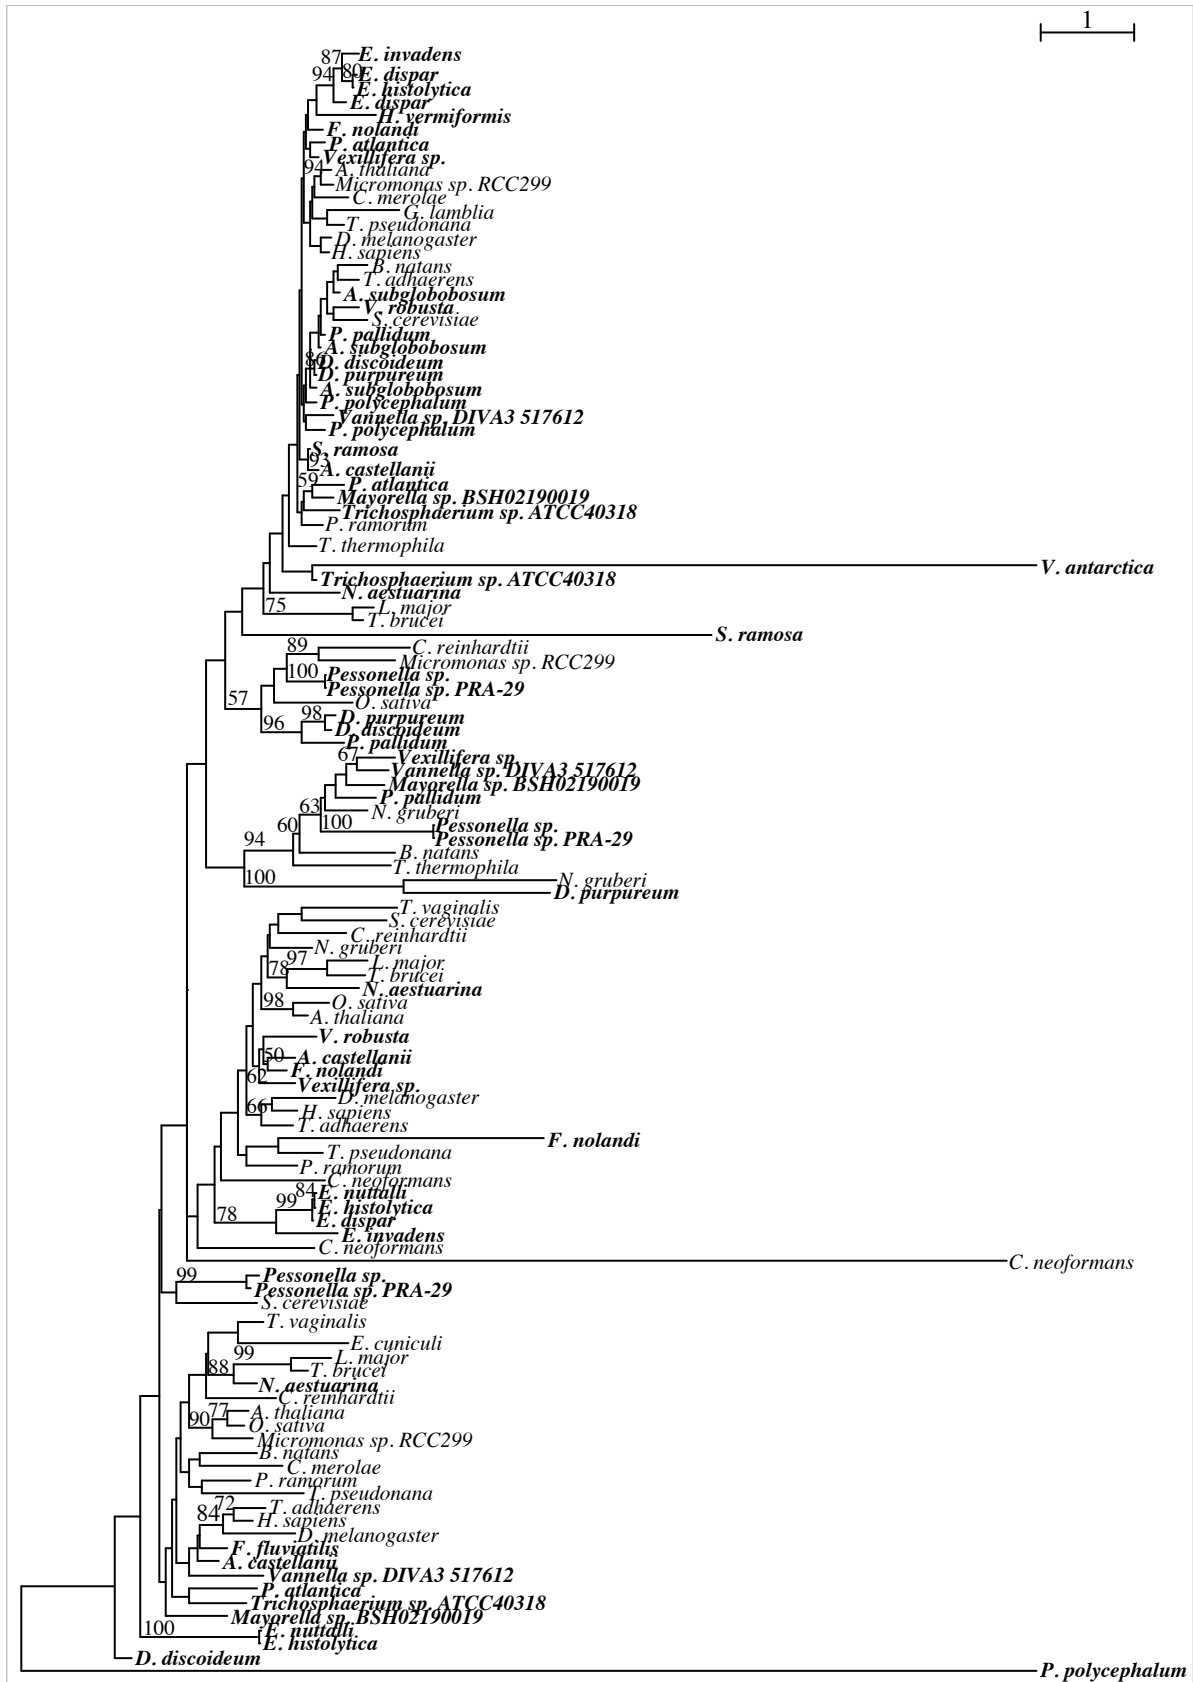

TEL1/ATM

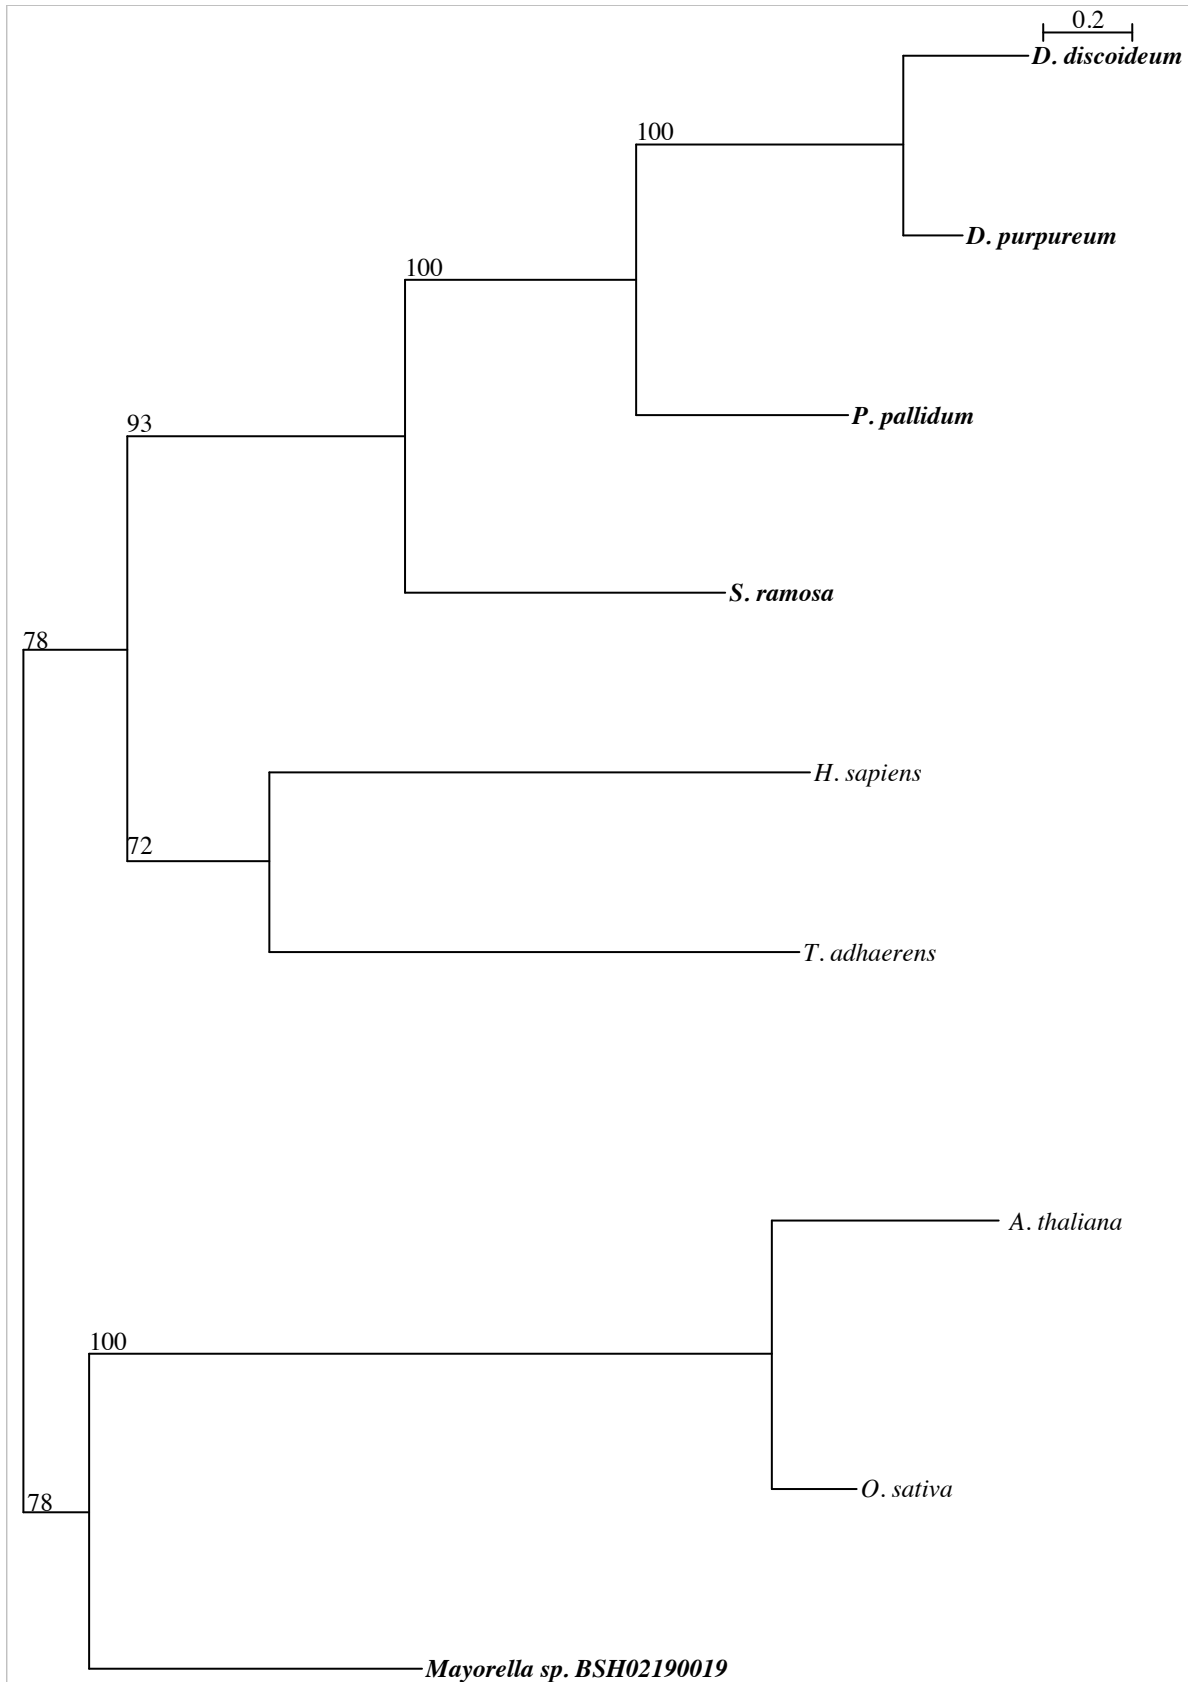

XRCC4/LIF1

fig. S3: Maximum likelihood trees of meiosis-specific and meiosis-related genes. Bootstrap support values  $\geq 50\%$  shown above branches.
